# Supplementary material
Source: HighWire-hosted journal article supplement (https://cmajopen.ca/highwire/filestream/80761/field_highwire_adjunct_files/2/open-2013-0053-original-submission.pdf)
Supplement: open-2013-0053-original-submission.pdf [file open-2013-0053-original-submission.pdf]

1  
2  
3  
4  
5  
6  
7  
8  
9  
10  
11 Site of Hospital Readmission and Mortality  
12  
13  
14  
15  
16  
17  
18  
19

20  
21 John A Staples MD, FRCPC, MPH [1, 2]  
22

23 Deva Thiruchelvam MSc [1]  
24

25 Donald A Redelmeier MD, MS(HSR), FRCPC [1, 3, 4, 5]  
26  
27  
28  
29  
30

31 [1] Institute for Clinical Evaluative Sciences in Ontario  
32

33 [2] Division of General Internal Medicine, University of Washington  
34

35 [3] Division of General Internal Medicine, Sunnybrook Health Sciences Centre  
36

37 [4] Clinical Epidemiology Program, Sunnybrook Research Institute  
38

39 [5] Center for Leading Injury Prevention Practice Education & Research  
40  
41

42 Correspondence: John A. Staples  
43 Harborview Medical Center  
44 325 9<sup>th</sup> Ave Box 359780  
45 Seattle WA 98104 USA  
46 voice: (206) 744-4317  
47 fax: (206) 744-6063  
48 e-mail: john.a.staples@gmail.com  
49  
50  
51  
52  
53  
54  
55  
56  
57  
58  
59  
60

**Abstract (249 words)**

**Background:** Unplanned hospital readmission is a complex process, particularly if the patient is readmitted to an acute-care institution other than their original hospital. This study tested the hypothesis that alternate-hospital readmission is associated with increased patient mortality compared to original-hospital readmission.

**Methods:** We performed a population-based retrospective cohort analysis set between 1995 and 2010 within all 21 acute-care adult general hospitals of the Greater Toronto and Hamilton Area. Participants were consecutive adults ( $\geq 18$  years) emergently readmitted within 30 days of hospital discharge. The primary outcome measure was all-cause mortality within 30 days of readmission.

**Results:** A total of 198,149 patients were included, of whom 38,134 (19%) died within 30 days of readmission. Patients undergoing alternate-hospital readmission were more likely to be older, reside in a chronic care facility and arrive by ambulance. Alternate-hospital readmission was associated with a higher risk of death within 30 days (22% versus 19%;  $p < 0.001$ ; odds ratio 1.26; 95% confidence interval 1.23 - 1.30). The increased risk attenuated substantially after adjustment for patient- and hospital-level covariates (adjusted odds ratio 1.06; 95% confidence interval 1.02 - 1.10). Unadjusted Kaplan-Meier survival curves separated early and the absolute difference in mortality continued throughout the entire one-year follow-up period yet no difference between groups was observed on adjusted survival analyses.

**Interpretation:** Among patients readmitted within 30 days of discharge, alternate-hospital readmission was associated with a higher risk of death than original-hospital readmission. The increased mortality might be explained by a greater underlying severity of disease among patients undergoing alternate-hospital readmission.

## Introduction

Each year about 4.5 million Americans and about 0.2 million Canadians undergo unplanned hospital readmission within 30 days of hospital discharge<sup>1,2</sup>. Unplanned readmissions are costly, challenging to predict, difficult to avoid, and associated with increased mortality<sup>3,4,5,6,7,8,9</sup>. Although the majority of readmitted patients return to their original hospital, about one fifth spend their initial (“primary”) and subsequent (“secondary”) admissions in different hospitals<sup>10</sup>. Clinical experience suggests that unfamiliar patients can pose unique challenges, yet one study found no large difference in mortality between alternate-hospital readmissions and original-hospital readmissions<sup>11</sup>.

Patients undergoing alternate-hospital readmission might be disadvantaged by limited access to primary admission medical records, delayed treatments, discontinuity of care, and exposure to the nosocomial pathogens of multiple institutions<sup>12,13,14,15,16,17,18</sup>. On the other hand, alternate-hospital clinicians might be less likely to replicate errors committed during the primary hospitalization, less influenced by previously affixed diagnostic labels, and less dispirited by a patient’s return to hospital<sup>19</sup>. Additionally, alternate-hospital procedures and protocols might intercept problems arising from the original hospital and facilitate rectification of prior medical errors<sup>20</sup>. These multiple countervailing forces have an uncertain aggregate influence on patient outcomes.

Whether a patient undergoes original-hospital readmission or alternate-hospital readmission is determined by factors that include hospital proximity, specialist availability, ambulance referral patterns, local traffic conditions, anticipated emergency department delays, institutional reputation, and patient preference<sup>21,22,23,24</sup>. The complexity and heterogeneity of these factors would make a prospective randomized trial logistically challenging and ethically

1  
2  
3 dubious. We therefore performed a population-based retrospective cohort analysis using linked  
4  
5 administrative databases to test whether alternate-hospital readmissions were followed by a  
6  
7 higher risk of death than original-hospital readmissions.  
8  
9

## 10 11 12 13 14 **Methods**

### 15 16 17 Setting

18  
19  
20 We focused on a large metropolitan area, reasoning that alternate-hospital readmissions  
21  
22 in rural regions would be uncommon, difficult to modify, and confounded by referrals for urban  
23  
24 subspecialty care. We selected Ontario's Greater Toronto and Hamilton Area (GTHA) because it  
25  
26 is Canada's largest contiguous urban region<sup>25</sup>. The GTHA had a land area of 8,241 square  
27  
28 kilometers and a population of 5.6 million residents at the midpoint of the study (2002)<sup>26</sup>.  
29  
30 Throughout the study interval, Ontario residents had universal health insurance that provided  
31  
32 access to medical care that was widely available, publically funded, and free at the point of  
33  
34 service<sup>27</sup>. The healthcare system within the GTHA provided a full array of primary, secondary,  
35  
36 tertiary, and quaternary care with no major changes to hospital financing during the study.  
37  
38  
39  
40  
41

### 42 Hospitals

43  
44  
45 We performed an individual-level analysis of patients whose primary and secondary  
46  
47 hospitalizations both occurred within the GTHA. This approach minimized confounding by  
48  
49 excluding patients referred from rural regions for subspecialty readmission. We first identified  
50  
51 all acute-care hospitals operating in the GTHA between 1995 and 2010. Individual inpatient  
52  
53 acute-care sites sharing the same facility identification number were classified as a multi-site  
54  
55 hospital because the shared data information systems, personnel, protocols, and governance  
56  
57  
58  
59  
60

1  
2  
3 made such multi-site hospitals the smallest meaningful functional unit for analysis. Individual  
4 inpatient acute-care sites that had no sister sites were classified as single-site hospitals. We  
5  
6 excluded hospitals without adult inpatient acute-care beds and hospitals restricted to pediatric,  
7  
8 elective surgical, rehabilitative, respite, or palliative care. Inpatient acute-care sites that joined a  
9  
10 multi-site hospital during the study period were included following the merger date.  
11  
12  
13  
14

### 15 16 Patients

17  
18  
19 We identified adult patients aged 18 years or older who had one or more eligible hospital  
20  
21 readmissions during the study interval. A readmission was eligible if: (1) the patient was  
22  
23 readmitted to hospital through the emergency department between 1 January 1995 and 31  
24  
25 December 2010; (2) the elapsed time between initial hospital discharge and subsequent hospital  
26  
27 readmission was  $\geq 1$  day and  $\leq 30$  days; and, (3) both the primary and secondary  
28  
29 hospitalizations occurred in qualifying GTHA hospitals. A readmission was ineligible if the most  
30  
31 responsible diagnosis for the primary or secondary hospitalization was related to pregnancy  
32  
33 (ICD-9 630-676, ICD-10-CA O00-O99) or major psychiatric disorder (ICD-9 295-300, ICD-10-  
34  
35 CA F20-F48). Same-day readmissions were excluded to avoid misidentifying hospital-to-  
36  
37 hospital transfers as readmissions. Patients with multiple readmissions were analyzed according  
38  
39 to the most recent eligible readmission, so that each individual contributed only once to analyses.  
40  
41  
42  
43  
44

### 45 Variables

46  
47 The primary study outcome was all-cause mortality within 30 days of the date of hospital  
48  
49 readmission, as ascertained from the official government vital statistics record for Ontario  
50  
51 (eFigure 1). Secondary outcomes examined in-hospital case-fatality and all-cause mortality at 90,  
52  
53 180, and 365 days of readmission. The principal predictor was the site of hospital readmission,  
54  
55 categorized in a dichotomous manner as original-hospital readmission or alternate-hospital  
56  
57  
58  
59  
60

1  
2  
3 readmission. Original-hospital readmissions were defined as those where both the primary and  
4 secondary hospitalizations occurred at the same hospital. Alternate-hospital readmissions were  
5 defined as those where the primary and secondary hospitalizations occurred at different  
6 hospitals.  
7  
8  
9  
10  
11

12 Additional predictors were derived based on prior research and included patient  
13 demographics, average neighborhood household income (quintiles), rural residence (yes, no),  
14 year of readmission, Charlson co-morbidity score (integer), primary hospitalization length of  
15 stay (days), most responsible diagnosis for secondary hospitalization, arrival by ambulance at the  
16 time of secondary hospitalization (yes, no), and total number of hospitalizations in the year prior  
17 to readmission (integer), and total number of physician clinic visits in the year prior to  
18 readmission (integer)<sup>5,28</sup>. We included the hospital-free interval, defined as the number of days  
19 between hospital discharge and readmission. On the basis of prior literature we also examined  
20 secondary hospital annual case volume (integer) and secondary hospital sector (designated as  
21 academic sector or community sector by system-level hospital reports)<sup>29,30,31,32,33</sup>. Variables were  
22 modeled as continuous values unless otherwise indicated above but are displayed in categorical  
23 format to facilitate interpretation.  
24  
25  
26  
27  
28  
29  
30  
31  
32  
33  
34  
35  
36  
37  
38  
39  
40

41 In the Canadian setting, the condition most responsible for the length of a patient's  
42 hospital stay is reported as the most responsible diagnosis<sup>34</sup>. In our study, the most responsible  
43 diagnosis for each admission was coded according to the International Classification of Diseases,  
44 using the Ninth Revision (ICD-9) prior to 1 April 2002 and the Tenth Revision, Canada (ICD-  
45 10-CA) after 1 April 2002<sup>35,36</sup>. We adapted the 285 single-level diagnostic categories in the  
46 Agency for Healthcare Research and Quality's Clinical Classifications Software to cluster  
47  
48  
49  
50  
51  
52  
53  
54  
55  
56  
57  
58  
59  
60

1  
2  
3 individual diagnostic codes into 30 mutually exclusive, clinically meaningful diagnostic  
4 categories (eTable 1)<sup>37</sup>.  
5  
6

### 7 8 Databases

9  
10 Encrypted patient-level data were obtained through validated, population-based, linked  
11 administrative databases used extensively in prior research<sup>17,38,39</sup>. Information on outpatient  
12 clinic visits and hospitalizations was obtained from the Ontario Health Insurance Plan database  
13 and the Canadian Institutes for Health Information database, respectively<sup>40,41</sup>. Demographics,  
14 vital status, and date of death were obtained from official government records<sup>42</sup>. Socioeconomic  
15 status was estimated using average household income at the census tract level using the 2006  
16 Canadian census<sup>43</sup>. Hospital structural and operational data (including designation as an  
17 academic or community sector hospital) were obtained from reports published at or near the  
18 study midpoint<sup>29,44,45,46</sup>. The study interval extended from 1995 to 2010 to include the most  
19 recent year for which data was available and to reflect an interval with no major changes in  
20 hospital financing.  
21  
22  
23  
24  
25  
26  
27  
28  
29  
30  
31  
32  
33  
34  
35

### 36 Missing Data

37  
38 Where data for average neighborhood household income and rural residence were absent  
39 they were coded as missing and retained for analysis (less than 0.1% of patients). Patient-level  
40 data were otherwise complete. The research ethics board of the Sunnybrook Research Institute  
41 approved the study including a waived requirement for individual consent.  
42  
43  
44  
45  
46  
47

### 48 Statistical Analysis

49  
50 The primary analysis compared 30-day patient mortality following alternate-hospital  
51 readmission to 30-day patient mortality following original-hospital readmission. Unadjusted  
52 risks were compared using a chi-squared test and then adjusted for patient- and hospital-level  
53  
54  
55  
56  
57  
58  
59  
60

1  
2  
3 covariates through a logistic regression model that applied general estimating equations (GEE)  
4  
5 with an exchangeable correlation structure to account for clustering of individuals within  
6  
7 hospitals<sup>47</sup>. A subsequent analysis stratified patients by secondary hospital, calculated hospital-  
8  
9 specific unadjusted odds ratios, and then calculated hospital-specific adjusted odds ratios by  
10  
11 fitting separate logistic regression models to each hospital to account for individual patient  
12  
13 characteristics. Further models stratified the pooled cohort on patient characteristics and  
14  
15 performed unadjusted univariate GEE analyses to explore potential effect modification.  
16  
17  
18

19  
20 Kaplan-Meier survival curves were generated for unadjusted survival up to one year and  
21  
22 tested using the log-rank test. An adjusted survival analysis was performed using a Cox  
23  
24 proportional hazards analysis. In-hospital case-fatality and death by 90, 180, and 365 days was  
25  
26 examined using the multivariate GEE logistic regression model developed for the primary  
27  
28 outcome. One sensitivity analysis retained only the first (rather than most recent) eligible  
29  
30 readmission for each patient. A second sensitivity analysis examined the influence of analyzing  
31  
32 according to primary (rather than secondary) hospital. A third sensitivity analysis defined all  
33  
34 patients readmitted within 48 hours as hospital-to-hospital transfers and excluded these patients  
35  
36 from analysis. A post hoc exploratory analysis examined the relative influence of distinct  
37  
38 hospital sector transitions (Appendix). All analyses used two-sided statistical tests performed at  
39  
40 the 5% level of significance using SAS, version 9.2 (SAS Institute Inc., Cary, NC).  
41  
42  
43  
44

#### 45 46 Role of the Funding Source

47  
48 The study was funded by the Canadian Institutes of Health Research and by funding  
49  
50 associated with one author's (DAR) Canada Research Chair in Medical Decision Sciences.  
51  
52 Neither funding organization had any role in the design of the study; in the collection, analysis,  
53  
54  
55  
56  
57  
58  
59  
60



1  
2  
3 or interpretation of the data; and in the preparation, review, or approval of the manuscript for  
4  
5 publication.  
6  
7  
8

## 9 10 **Results**

### 11 Hospital Overview

12  
13  
14  
15  
16 A total of 43 inpatient acute-care sites representing 28 distinct hospitals were active  
17  
18 within the GTHA during the study period. Seven single-site hospitals provided highly restricted  
19  
20 sub-specialty care and were excluded from analysis (3 provided only elective surgical services, 3  
21  
22 provided only palliative care, and 1 provided only pediatric care), leaving 21 qualifying acute-  
23  
24 care hospitals (eFigure 2). Hospital characteristics at the midpoint of the study appear in the on-  
25  
26 line only material (eTable 2 & eTable 3).  
27  
28  
29  
30

### 31 Patient Characteristics

32  
33  
34 We identified 2,448,759 patients with one or more admissions to qualifying acute-care  
35  
36 hospitals in the GTHA during the 16-year study period, of which 198,228 (8.1%) were eligible  
37  
38 for study inclusion due to a subsequent readmission within the GTHA. We excluded 79 patients  
39  
40 who had a date of death erroneously recorded as occurring prior to readmission date, resulting in  
41  
42 a cohort of 198,149 individual patients (Figure 1). 58,460 (29.5%) patients had more than one  
43  
44 eligible readmission, but only the most recent readmission episode for each patient was retained  
45  
46 in the primary analysis (eFigure 3). Less than 0.003% of data were missing for age, sex, average  
47  
48 neighborhood household income, prior physician visits, prior hospitalizations, or most  
49  
50 responsible diagnoses for primary and secondary hospitalization.  
51  
52  
53  
54  
55

56 (\*\*Figure 1: Patient Flow Diagram about here\*\*\*)  
57  
58  
59  
60

1  
2  
3 Of the 198,149 patients in our cohort, a total of 161,974 (82%) underwent original-  
4 hospital readmission and 36,175 (18%) underwent alternate-hospital readmission. Compared to  
5 patients undergoing original-hospital readmission, patients undergoing alternate-hospital  
6 readmission were more likely to be older, male, a resident of a chronic care facility, burdened by  
7 more comorbidity (as measured by Charlson comorbidity score and by hospital admissions and  
8 clinic visits in the previous year), and brought to hospital by ambulance for readmission (Table  
9 1). Compared to original-hospital readmissions, alternate-hospital readmissions were somewhat  
10 more likely to occur at community hospitals or at those with a lower annual case volume (eTable  
11 6).

12  
13  
14  
15  
16  
17  
18  
19  
20  
21  
22  
23  
24  
25  
26 (\*\*Table 1: Patient Characteristics about here\*\*)

### 27 28 Short-term Mortality

29  
30  
31 Compared to patients undergoing original-hospital readmission, patients undergoing  
32 alternate-hospital readmission were significantly more likely to die within 30 days (8,072 of  
33 36,175 patients [22%] versus 30,062 of 161,974 patients [19%]; Chi-squared p-value <0.001).  
34 This difference was equivalent to an unadjusted odds ratio of 1.26 (95% confidence interval 1.23  
35 – 1.30; p-value <0.001). Adjustment for patient and hospital factors substantially attenuated this  
36 association (adjusted odds ratio 1.06; 95% confidence interval 1.02 – 1.10; p-value, 0.003).  
37 Additional independent predictors of death appear in Table 2. In our final model, the relative  
38 increase in risk of 30-day mortality attributable to alternate-hospital readmission was generally  
39 smaller than the risk associated with either sepsis or pneumonia (Table 2). The within-hospital  
40 correlation coefficient from our primary analysis was 0.12.

41  
42  
43  
44  
45  
46  
47  
48  
49  
50  
51  
52  
53  
54  
55  
56 (\*\*Table 2: Additional Predictors of 30-day Mortality about here\*\*)

### Stratification by Individual Hospital

Alternate-hospital readmission was associated with a significant increase in the adjusted odds of 30-day mortality for four of six academic secondary hospitals. All other secondary hospitals demonstrated no significant difference in the adjusted risk of mortality between alternate-hospital readmissions and original-hospital readmissions (Figure 2; eTable 7). Post hoc stratification of the multivariate GEE model by secondary hospital sector demonstrated a significant association between alternate-hospital readmission and 30-day mortality for academic sector hospitals (adjusted odds ratio, 1.17, 95% confidence interval 1.15 – 1.19, p-value <0.0001), but not for community sector hospitals (adjusted odds ratio, 1.00, 95% confidence interval 0.97 – 1.04, p-value 0.81). Results of an exploratory analysis examining specific hospital sector transitions yielded similar findings (eTable 9).

(\*\*\*Figure 2: Odds Ratio for 30-day Mortality, Stratified... about here\*\*\*)

### Patient Subgroups

The unadjusted association between alternate-hospital readmission and increased mortality was present among patients of all age groups, all neighborhood household income quintiles, and both sexes (Table 3). The relative increase in risk was accentuated among women and among patients with less comorbidity, fewer hospitalizations, and a residence other than a chronic care facility. The increased risk was particularly significant among patients with a secondary hospitalization diagnosis of injury, diverticular disease, or intestinal obstruction. A most responsible diagnosis of chronic ischemic heart disease was the only subgroup in which alternate-hospital readmission was associated with a significant reduction in mortality on univariate analysis (eTable 10).

1  
2  
3 (\*\*Table 3: Unadjusted Primary Outcome Stratified ... about here\*\*)  
4  
5

### 6 7 Delayed Mortality

8  
9  
10 Unadjusted survival analysis demonstrates that the risk associated with alternate-hospital  
11 readmission equated to an absolute difference in mortality of 4% that was sustained throughout  
12 the one year follow-up period (Figure 3; log rank test p-value < 0.001). In contrast, adjusted  
13 survival analysis found no difference between the groups (hazard ratio 1.01; 95% confidence  
14 interval 0.99 – 1.02; p-value = 0.44). Adjusted analyses at specific time points found that the  
15 adjusted odds of subsequent death at 90, 180, or 365 days following readmission was no  
16 different between the alternate- and original-hospital readmissions (eTable 11).  
17  
18  
19  
20  
21  
22  
23  
24  
25  
26

27 (\*\*Figure 3: Kaplan-Meier Survival Curve about here\*\*)  
28  
29

### 30 31 Sensitivity Analyses

32  
33  
34 Retaining only the first rather than the most recent readmission for each patient resulted  
35 in a similar primary outcome summary effect estimate: 20,571 [13%] of 161,955 patients  
36 undergoing original-hospital readmission died while 5,780 [16%] of 36,194 patients undergoing  
37 alternate-hospital readmission died (unadjusted odds ratio 1.30, 95% confidence interval 1.27 –  
38 1.35; adjusted odds ratio 1.08, 95% confidence interval 1.04 – 1.12). Analyzing by primary  
39 rather than secondary hospital had little effect on the summary effect measure generated by the  
40 multivariate GEE model (adjusted odds ratio 1.08, 95% confidence interval 1.01 – 1.16) despite  
41 more pronounced influences on the unadjusted hospital-specific effect estimates (eFigure 4).  
42  
43  
44  
45  
46  
47  
48  
49  
50  
51  
52  
53 Extending the definition of hospital-to-hospital transfer to exclude patients readmitted within 48  
54 hours resulted in a smaller cohort (n = 187,446) but did not influence the primary outcome  
55  
56  
57  
58  
59  
60

1  
2  
3 summary effect measure (adjusted odds ratio 1.05, 95% confidence interval 1.02 – 1.09, p =  
4  
5 0.003).  
6  
7  
8  
9  
10

## 11 **Interpretation**

12  
13  
14  
15 Alternate-hospital readmission was associated with increased patient mortality in this  
16  
17 population-based observational cohort study. Unadjusted analyses suggest that the increase in  
18  
19 mortality was immediate (with increased in-hospital case-fatality), substantial (corresponding to  
20  
21 a 4% absolute increase in mortality), and sustained (persisting over the one-year follow-up  
22  
23 period). Most of the observed association could be explained by patient age and comorbidities.  
24  
25 Regardless of causal mechanism, these findings suggest that alternate-hospital readmission has  
26  
27 an ominous prognostic significance.  
28  
29  
30  
31

32  
33 One interpretation of these findings is that alternate-hospital readmission can compromise  
34  
35 patient safety, in accord with past studies examining discontinuous care<sup>48,49,50</sup>. An alternate  
36  
37 interpretation is that increased patient mortality reflects residual confounding by unmeasured  
38  
39 covariates that are imbalanced between the original- and alternate-hospital patients in our cohort  
40  
41 (eTable 12). This interpretation acknowledges that conditions with relatively poor prognoses also  
42  
43 predispose patients to alternate-hospital readmission, and that system factors promoting  
44  
45 alternate-hospital readmission (such as ambulance diversion or prolonged emergency department  
46  
47 wait times) also delay care and adversely impact patient outcomes<sup>51,52</sup>. Given the potential  
48  
49 importance for patient outcomes, further examination of the association between alternate-  
50  
51 hospital readmission and mortality is warranted.  
52  
53  
54  
55  
56  
57  
58  
59  
60

1  
2  
3 Our exploratory analyses found that the association between alternate-hospital  
4 readmission and mortality was present in academic sector readmitting hospitals but within  
5 community sector readmitting hospitals. Exploratory comparisons of specific hospital sector  
6 transitions also suggested that hospital sector influences the association between alternate-  
7 hospital readmission and mortality (eTable 9). One explanation for this finding is that academic  
8 hospitals care for highly complex patients who might be particularly vulnerable to discontinuities  
9 in care<sup>31</sup>. A second explanation points to the confounding that might be introduced if patients  
10 with severe or unusual illnesses were directed to subspecialty academic centers for readmission.  
11 A third explanation focuses on differences in organizational culture between academic and  
12 community hospitals<sup>52</sup>. Further research, including organizational network analysis, may help  
13 clarify this finding<sup>53,54</sup>.

14  
15  
16  
17  
18  
19  
20  
21  
22  
23  
24  
25  
26  
27  
28  
29  
30 Several features distinguish our study from past research<sup>11</sup>. We defined alternate-hospital  
31 versus original-hospital readmission in advance as the primary predictor of interest. Our patient  
32 cohort was population-based, universally insured, selected over an extended interval, and  
33 substantial in size. We focused on a large contiguous metropolitan area and excluded rural  
34 hospitals with potentially idiosyncratic readmission patterns. Each hospital in our study  
35 contributed a large number of patients (average of 9455 per hospital), allowing analyses to  
36 account for actual readmission site. Finally, a high proportion of our cohort died within 30 days  
37 of readmission, suggesting our patients had a substantial burden of comorbidity, a high acuity of  
38 presenting illness, or some combination of both.

39  
40  
41  
42  
43  
44  
45  
46  
47  
48  
49  
50  
51  
52  
53  
54  
55  
56  
57  
58  
59  
60  
Our study has several limitations inherent to an observational design. Detailed information such as clinical history, physical exam findings, laboratory data, patient preferences, cause of death, and indicators of hospital performance were not available. We had no

1  
2  
3 information on the factors motivating alternate-hospital readmission (e.g. dissatisfaction with  
4 prior care, geographic proximity when illness recurred, specialist availability) and could not  
5 assess the modifiability of the readmission patterns. Information about features that might both  
6 independently influence a patient's emergency department selection and their health outcomes  
7 (such as homelessness, the frequency of motor vehicle travel, or awareness of institutional  
8 expertise) was not available. Our focus on a single region also limits the generalizability of  
9 results. The mechanism by which alternate-hospital readmission might increase the risk of death  
10 remains a matter of conjecture.  
11  
12  
13  
14  
15  
16  
17  
18  
19  
20  
21  
22

23 Despite these limitations, our study has several implications for patients, clinicians, and  
24 policymakers. Prior to discharge, patients should be informed of the potential advantages of  
25 returning to their original hospital should they relapse and require emergency care<sup>39,55</sup>. Primary  
26 care clinicians and pre-hospital medical service providers should inquire about recent admissions  
27 and direct patients back to their original hospital where feasible. Health care financing policies  
28 that partially pay hospitals based on observed readmission rates need to consider the large  
29 numbers of patients readmitted to alternate hospitals and the distinctly high burden of illness  
30 associated with such alternate hospital readmissions. In the interim, the data suggest that  
31 alternate-hospital readmissions are worrisome and merit attention.  
32  
33  
34  
35  
36  
37  
38  
39  
40  
41  
42  
43  
44  
45  
46  
47  
48  
49  
50  
51  
52  
53  
54  
55  
56  
57  
58  
59  
60

1  
2  
3 **Acknowledgements**  
4

5 The authors have no conflicts of interest to declare.  
6

7  
8 All authors contributed equally to the design and conduct of the study. D Thiruchelvam and JA  
9 Staples had full access to all the data in the study and take responsibility for the integrity of the  
10 data and the accuracy of the data analysis. All authors contributed to data interpretation. The  
11 initial draft of the manuscript was prepared by JA Staples. All authors revised the manuscript and  
12 provide their approval for submission.  
13  
14

15 The study was funded by the Canadian Institutes of Health Research and by funding associated  
16 with DA Redelmeier’s Canada Research Chair in Medical Decision Sciences. Neither funding  
17 organization was involved in the design and conduct of the study; collection, management,  
18 analysis, and interpretation of the data; preparation, review, and approval of the manuscript; and  
19 decision to submit the manuscript for analysis.  
20  
21  
22

23 The authors thank William Chan, Mara Hansen, Finlay McAlister, Graham Nichol, Kelley Ross,  
24 Michael Schwandt, Michael Schull, Therese Stukel, and Carl van Walraven for their insightful  
25 comments.  
26  
27  
28  
29  
30  
31  
32  
33  
34  
35  
36  
37  
38  
39  
40  
41  
42  
43  
44  
45  
46  
47  
48  
49  
50  
51  
52  
53  
54  
55  
56  
57  
58  
59  
60



## References

1. Jencks SF. Defragmenting care. *Ann Intern Med.* 2010;153(11):757-758.
2. Canadian Institute for Health Information. All-cause readmission to acute care and return to the emergency department. Ottawa (ON): CIHI; 2012.
3. Jencks S, Williams M, Coleman E. Rehospitalizations among patients in the Medicare fee-for-service program. *NEJM.* 2009;360(14):1418-1428.
4. Allaudeen N, Schnipper JL, Orav EJ, Wachter RM, Vidyarthi AR. Inability of providers to predict unplanned readmissions. *J Gen Intern Med.* 2011;26(7):771-776.
5. Kansagara D, Englander H, Salanitro A *et al.* Risk prediction models for hospital readmission: a systematic review. *JAMA.* 2011;306(15):1688-1698.
6. van Walraven C, Bennett C, Jennings A, Austin PC, Forster AJ. Proportion of hospital readmissions deemed avoidable: a systematic review. *CMAJ.* 2011;183(7):E391.
7. Hansen LO, Young RS, Hinami K, Leung A, Williams MV. Interventions to reduce 30-day rehospitalization: a systematic review. *Ann Intern Med.* 2011;155(8):520-528.
8. Laniece I, Couturier P, Drame M *et al.* Incidence and main factors associated with early unplanned hospital readmission among French medical inpatients aged 75 years and over admitted through emergency units. *Age Ageing.* 2008;37(4):416-422.
9. Glynn N, Bennett K, Silke B. Emergency medical readmission: long-term trends and impact on mortality. *Clin Med.* 2011;11(2):114-118.
10. Nasir K, Lin Z, Bueno H *et al.* Is same-hospital readmission rate a good surrogate for all-hospital readmission rate? *Med Care.* 2010;48(5):477-481.
11. Kind AJM, Bartels C, Mell MW, Mullahy J, Smith M. For-profit hospital status and rehospitalizations at different hospitals: an analysis of Medicare data. *Ann Intern Med.* 2010;153(11):718-727.
12. Stiell A, Forster AJ, Stiell IG, van Walraven C. Prevalence of information gaps in the emergency department and the effect on patient outcomes. *CMAJ.* 2003;169(10):1023-1028.
13. Kripalani S, LeFevre F, Phillips CO, Williams MV, Basaviah P, Baker DW. Deficits in communication and information transfer between hospital-based and primary care physicians. *JAMA.* 2007;297(8):831-841.

14. Gaieski DF, Mikkelsen ME, Band RA *et al.* Impact of time to antibiotics on survival in patients with severe sepsis or septic shock in whom early goal-directed therapy was initiated in the emergency department. *Crit Care Med.* 2010;38(4):1045-1053.
15. Goldberg RJ, Mooradd M, Gurwitz JH *et al.* Impact of time to treatment with tissue plasminogen activator on morbidity and mortality following acute myocardial infarction (The second National Registry of Myocardial Infarction). *Am J Cardiol.* 1998;82(3):259-264.
16. Lees KR, Bluhmki E, von Kummer R *et al.* Time to treatment with intravenous alteplase and outcome in stroke: an updated pooled analysis of ECASS, ATLANTIS, NINDS, and EPITHET trials. *Lancet.* 2010;375(9727):1695-1703.
17. van Walraven C, Mamdani M, Fang J, Austin PC. Continuity of care and patient outcomes after hospital discharge. *J Gen Intern Med.* 2004;19(6):624-631.
18. Otter JA, Yezli S, French GL. The role played by contaminated surfaces in the transmission of nosocomial pathogens. *Infect Control Hosp Epidemiol.* 2011;32(7):687-699.
19. Croskerry P. The importance of cognitive errors in diagnosis and strategies to minimize them. *Acad Med.* 2003;78(8):775-80.
20. Reason J. Human error: models and management. *BMJ.* 2000;320(7237):768-770.
21. Pham JC, Patel R, Millin MG, Kirsch TD, Chanmugam A. The effects of ambulance diversion: a comprehensive review. *Acad Emerg Med.* 2006;13(11):1220-1227.
22. Trzeciak S, Rivers EP. Emergency department overcrowding in the United States: an emerging threat to patient safety and public health. *Emerg Med J.* 2003;20(5):402-405.
23. Luft HS, Garnick DW, Mark DH *et al.* Does quality influence choice of hospital? *JAMA.* 1990;263(21):2899-2906.
24. Kolstad JT, Chernew ME. Quality and consumer decision making in the market for health insurance and health care services. *Med Care Res Rev.* 2009;66(1 Suppl):28S-52S.
25. The Greater Toronto Transit Authority. The Big Move. Toronto, Ontario: Government of Ontario; 2008. 111p.
26. 2001 Community Profiles. In: 2001 Census of Population. Ottawa, Canada: Statistics Canada; c2002 [updated 4 April 2007; cited 25 June 2012]. Available from: <http://www12.statcan.ca/english/Profil01/CP01/Index.cfm?Lang=E>
27. Canada Health Act, c. 6, s. 10 (1984).

- 1  
2  
3  
4  
5  
6  
7  
8  
9  
10  
11  
12  
13  
14  
15  
16  
17  
18  
19  
20  
21  
22  
23  
24  
25  
26  
27  
28  
29  
30  
31  
32  
33  
34  
35  
36  
37  
38  
39  
40  
41  
42  
43  
44  
45  
46  
47  
48  
49  
50  
51  
52  
53  
54  
55  
56  
57  
58  
59  
60
28. Quan H, Sundararajan V, Halfon P *et al.* Coding algorithms for defining comorbidities in ICD-9-CM and ICD-10 administrative data. *Med Care.* 2005;43(11):1130-1139.
  29. Hospital Report 2003: Acute Care. Ottawa, ON: Canadian Institute for Health Information; 2004.
  30. Allison JJ, Kiefe CI, Weissman NW *et al.* Relationship of hospital teaching status with quality of care and mortality for Medicare patients with acute MI. *JAMA.* 2000;284(10):1256-1262.
  31. Shahian DM, Nordberg P, Meyer GS *et al.* Contemporary performance of U.S. teaching and nonteaching hospitals. *Acad Med.* 2012;87(6):701-708.
  32. Ross JS, Normand SL, Wang Y, *et al.* Hospital volume and 30-day mortality for three common medical conditions. *NEJM.* 2010;362(12):1110-1118.
  33. Birkmeyer JD, Siewers AE, Finlayson EV, *et al.* Hospital volume and surgical mortality in the United States. *NEJM.* 2002;346:1128-1137.
  34. Tu JV, Pashos CL, Naylor CD, Chen E, Normand SL, Newhouse JP, McNeil BJ. Use of cardiac procedures and outcomes in elderly patients with myocardial infarction in the United States and Canada. *N Engl J Med.* 1997; 336: 1500–1505
  35. World Health Organization. *Manual of the International Statistical Classification of Diseases, Injuries, and Causes of Death, Ninth Revision.* Geneva, Switzerland: World Health Organization; 1977.
  36. Canadian Institute of Health Information. *International Statistical Classification of Diseases and Related Health Problems, Tenth Revision, Canada (ICD-10-CA).* Ottawa (ON): Canadian Institute of Health Information; 2012. Accessed 21 August 2012 at <http://www.cihi.ca/CIHI-ext-portal/internet/EN/TabbedContent/standards+and+data+submission/standards/classification+and+coding/cihi010689>
  37. Elixhauser A, Steiner C, Palmer L. Clinical Classifications Software (CCS), 2012. U.S. Agency for Healthcare Research and Quality. Accessed 21 August 2012 at <http://www.hcup-us.ahrq.gov/toolssoftware/ccs/ccs.jsp>
  38. Guttman A, Schull MJ, Vermeulen MJ, Stukel TA. Association between waiting times and short term mortality and hospital admission after departure from emergency department: population based cohort study from Ontario, Canada. *BMJ.* 2011;342(Issue):d2983.
  39. Gruneir A, Dhalla IR, van Walraven C, Fischer HD, Camacho X, Rochon PA, Anderson GM. Unplanned readmissions after hospital discharge among patients identified as being

- 1  
2  
3 at high risk for readmission using a validated predictive algorithm. *Open Med.*  
4 2011;5(2):E104.  
5  
6  
7 40. Williams JI, Young W. A summary of studies on the quality of health care administrative  
8 databases in Canada. In: Goel V, Williams JI, Anderson GM, Blacksterin-Hirsch P,  
9 Fooks C, Naylor CD, eds. *Patters of Health Care in Ontario: The ICES Practice Atlas.*  
10 Ottawa, ON, Canada: Canadian Medical Association; 1996: 339-345.  
11  
12  
13 41. Juurlink DN, Preyra C, Coxford R *et al.* Canadian Institute for Health Information  
14 Discharge Abstract Database: A Validation Study. Toronto, ON, Canada: Institute for  
15 Clinical Evaluative Sciences; 2006.  
16  
17  
18 42. Iron K, Zagorski BM, Sykora K, Manuel DG. Living and dying in Ontario: An  
19 opportunity for improved health information. ICES Investigative Report. Toronto:  
20 Institute for Clinical Evaluative Sciences; 2008.  
21  
22  
23 43. Krieger N. Overcoming the absence of socioeconomic data in medical records: validation  
24 and application of a census-based methodology. *Am J Public Health.* 1992;82:703-710.  
25  
26  
27 44. Rajan C, editor. *The Canadian Health Facilities Directory.* 4th ed. North York, ON:  
28 Business Information Group; 2002.  
29  
30  
31 45. The Canadian Hospital Association. Jackson T, editor. *The Guide to Canadian Health*  
32 *Facilities.* Volume 10. Ottawa (ON): CHA Press; 2002.  
33  
34  
35 46. The Canadian Hospital Association. Jackson T, editor. *The Guide to Canadian Health*  
36 *Facilities.* Volume 12. Ottawa (ON): CHA Press; 2004.  
37  
38  
39 47. Hubbard AE, Ahern J, Fleischer NL *et al.* Comparing population average and mixed  
40 models for estimating associations between neighborhood risk factors and health.  
41 *Epidemiology.* 2010;21(4):467-474.  
42  
43  
44 48. Moore C, Wisnivesky J, Williams S, McGinn T. Medical errors related to discontinuity of  
45 care from an inpatient to an outpatient setting. *J Gen Intern Med.* 2003;18(8):646-651.  
46  
47  
48 49. Kripalani S, LeFevre F, Phillips CO, Williams MV, Basaviah P, Baker DW. Deficits in  
49 communication and information transfer between hospital-based and primary care  
50 physicians: implications for patient safety and continuity of care. *JAMA.*  
51 2007;297(8):831-841.  
52  
53  
54 50. Bradford-Hill, A. The environment and disease: association or causation? *Proc R Soc*  
55 *Med.* 1965;58(5):295–300.  
56  
57  
58 51. Shen YC, Hsia RY. Association between ambulance diversion and survival among  
59 patients with acute myocardial infarction. *JAMA.* 2011;305(23):2440-7.  
60

- 1  
2  
3  
4  
5  
6  
7  
8  
9  
10  
11  
12  
13  
14  
15  
16  
17  
18  
19  
20  
21  
22  
23  
24  
25  
26  
27  
28  
29  
30  
31  
32  
33  
34  
35  
36  
37  
38  
39  
40  
41  
42  
43  
44  
45  
46  
47  
48  
49  
50  
51  
52  
53  
54  
55  
56  
57  
58  
59  
60
52. Hartmann CW, Meterko M, Rosen AK *et al.* Relationship of hospital organizational culture to patient safety climate in the Veterans Health Administration. *Med Care Res Rev.* 2009;66(3):320-38.
53. Lee BY, McGlone SM, Song Y *et al.* Social network analysis of patient sharing among hospitals in Orange County, California. *Am J Public Health (N Y).* 2011 Apr;101(4):707-13.
54. Donker T, Wallinga J, Grundmann H. Patient Referral Patterns and the Spread of Hospital-Acquired Infections through National Health Care Networks. *PLoS Comput Biol.* 2010;6(3): e1000715.
55. van Walraven C, Dhalla IA, Bell C, Etchells E, Stiell IG, *et al.* Derivation and validation of an index to predict early death or unplanned readmission after discharge from hospital to the community. *CMAJ.* 2010 Apr 6;182(6):551-7.
56. Canadian Institute for Health Information. Discharge Abstract Database. Ottawa (ON): Institute for Clinical Evaluative Sciences data holdings; c2011. Last updated 31 Mar 2011; Accessed 06 Jun 2012.

Table 1: Patient Characteristics

| Characteristic                                                                | Original-hospital<br>readmission<br>(n = 161,974) | Alternate-hospital<br>readmission<br>(n = 36,175) |
|-------------------------------------------------------------------------------|---------------------------------------------------|---------------------------------------------------|
| <b>Age<sup>†</sup></b>                                                        |                                                   |                                                   |
| <65 years                                                                     | 63,578 (39%)                                      | 13,064 (36%)                                      |
| 65-74 years                                                                   | 33,471 (21%)                                      | 7,602 (21%)                                       |
| 75-84 years                                                                   | 41,941 (26%)                                      | 9,650 (27%)                                       |
| ≥85 years                                                                     | 22,984 (14%)                                      | 5,859 (16%)                                       |
| <b>Female sex</b>                                                             | 80,941 (50%)                                      | 17,654 (49%)                                      |
| <b>Neighborhood household income*</b>                                         |                                                   |                                                   |
| Highest quintile                                                              | 29,375 (18%)                                      | 6,675 (19%)                                       |
| Next highest quintile                                                         | 29,277 (18%)                                      | 6,381 (18%)                                       |
| Middle quintile                                                               | 30,910 (19%)                                      | 6,609 (18%)                                       |
| Next lowest quintile                                                          | 35,262 (22%)                                      | 7,653 (21%)                                       |
| Lowest quintile                                                               | 36,696 (23%)                                      | 8,732 (24%)                                       |
| <b>Rural residence*</b>                                                       | 3,198 (2%)                                        | 465 (1%)                                          |
| <b>Additional hospitalizations<br/>in prior year</b>                          | 81,549 (50%)                                      | 19,428 (54%)                                      |
| <b>Seven or more physician clinic visits<br/>in prior year<sup>†</sup></b>    | 125,726 (78%)                                     | 28,540 (79%)                                      |
| <b>Charlson co-morbidity score ≥2</b>                                         | 84,955 (52%)                                      | 19,704 (55%)                                      |
| <b>Most responsible diagnosis for<br/>primary hospitalization<sup>‡</sup></b> |                                                   |                                                   |
| Malignant neoplasm                                                            | 19,590 (12%)                                      | 4,303 (12%)                                       |
| Injury                                                                        | 10,666 (7%)                                       | 2,724 (8%)                                        |
| Acute coronary syndrome                                                       | 9,000 (6%)                                        | 2,115 (6%)                                        |
| Heart failure                                                                 | 9,258 (6%)                                        | 1,856 (5%)                                        |
| Pneumonia                                                                     | 6,696 (4%)                                        | 1,588 (4%)                                        |
| Obstructive lung disease                                                      | 6,742 (4%)                                        | 1,316 (4%)                                        |
| Chronic ischemic heart disease                                                | 3,168 (2%)                                        | 2,440 (7%)                                        |
| Cardiac arrhythmia                                                            | 4,318 (3%)                                        | 824 (2%)                                          |
| Cerebrovascular disease                                                       | 3,708 (2%)                                        | 1,135 (3%)                                        |
| Miscellaneous                                                                 | 49,237 (30%)                                      | 10,652 (29%)                                      |
| <b>Primary length of stay<sup>†</sup> greater than<br/>cohort median</b>      | 92,533 (57%)                                      | 20,843 (58%)                                      |
| <b>Hospital-free interval<sup>†</sup> greater than<br/>cohort median</b>      | 80,749 (50%)                                      | 20,321 (56%)                                      |
| <b>Resident of chronic care facility<br/>at readmission</b>                   | 16,479 (10%)                                      | 5,446 (15%)                                       |
| <b>Arrival by ambulance at readmission</b>                                    | 70,523 (44%)                                      | 20,677 (57%)                                      |

\* Missing data was coded as such and included in analyses. It was uncommon and is not presented here (<0.003% of cohort).

<sup>†</sup> Variable were analyzed as continuous data but are presented here in categorical format for interpretation.

<sup>‡</sup> The ten most common diagnostic categories were selected for presentation here. For a full listing of primary and secondary hospitalization diagnostic categories and their frequency, see eTables 4 and 5.

**Table 2: Additional Predictors of Death Within 30 Days of Hospital Readmission**

| Predictor                                                                   | Adjusted Odds Ratio* (95% CI) |
|-----------------------------------------------------------------------------|-------------------------------|
| <b>Age<sup>†</sup></b>                                                      |                               |
| <65 years                                                                   | Reference                     |
| 65-74 years                                                                 | 1.26 (1.23 – 1.30)            |
| 75-84 years                                                                 | 1.49 (1.43 – 1.55)            |
| ≥85 years                                                                   | 2.05 (1.90 – 2.21)            |
| <b>Sex</b>                                                                  |                               |
| Female                                                                      | Reference                     |
| Male                                                                        | 1.15 (1.13 – 1.16)            |
| <b>Neighborhood household income<sup>‡</sup></b>                            |                               |
| Highest quintile                                                            | Reference                     |
| Next quintile                                                               | 0.99 (0.96 – 1.03)            |
| Middle quintile                                                             | 1.01 (0.98 – 1.04)            |
| Next quintile                                                               | 1.03 (0.98 – 1.09)            |
| Lowest quintile                                                             | 1.01 (0.98 – 1.05)            |
| <b>Hospitalizations in prior year<sup>†</sup></b>                           |                               |
| 1                                                                           | Reference                     |
| ≥2                                                                          | 1.11 (1.09 – 1.14)            |
| <b>Physician clinic visits in prior year<sup>†</sup></b>                    |                               |
| <=6                                                                         | Reference                     |
| >=7                                                                         | 0.97 (0.94 – 1.00)            |
| <b>Charlson co-morbidity score<sup>†</sup></b>                              |                               |
| <=1                                                                         | Reference                     |
| >=2                                                                         | 1.87 (1.80 – 1.94)            |
| <b>Primary length of stay<sup>†</sup> longer than cohort median</b>         |                               |
| No                                                                          | Reference                     |
| Yes                                                                         | 1.20 (1.17 – 1.23)            |
| <b>Hospital-free interval<sup>†</sup> longer than cohort median</b>         |                               |
| No                                                                          | Reference                     |
| Yes                                                                         | 1.03 (1.00 – 1.05)            |
| <b>Resident of chronic care facility at readmission</b>                     |                               |
| No                                                                          | Reference                     |
| Yes                                                                         | 1.31 (1.25 – 1.37)            |
| <b>Most responsible diagnosis for secondary hospitalization<sup>§</sup></b> |                               |
| Cardiac arrest                                                              | 7.23 (5.70 – 9.18)            |
| Malignant neoplasm                                                          | 3.57 (3.16 – 4.03)            |
| Sepsis                                                                      | 3.10 (2.72 – 3.53)            |
| Liver disease                                                               | 2.29 (2.03 – 2.59)            |
| Pneumonia                                                                   | 1.87 (1.69 – 2.07)            |
| Miscellaneous                                                               | Reference                     |
| Nephrolithiasis                                                             | 0.44 (0.41 – 0.47)            |
| Nonspecific abdominal pain                                                  | 0.40 (0.36 – 0.43)            |
| Nonspecific chest pain                                                      | 0.26 (0.24 – 0.28)            |
| Syncope and collapse                                                        | 0.24 (0.22 – 0.27)            |
| Prostatic hypertrophy                                                       | 0.24 (0.20 – 0.29)            |
| <b>Arrival by ambulance at readmission</b>                                  |                               |
| No                                                                          | Reference                     |
| Yes                                                                         | 1.95 (1.88 – 2.01)            |
| <b>Year of readmission<sup>†</sup></b>                                      |                               |
| 1994 – 1999                                                                 | Reference                     |
| 2000 – 2005                                                                 | 0.95 (0.92 – 0.99)            |
| 2006 – 2010                                                                 | 0.87 (0.83 – 0.92)            |
| <b>Sector of secondary hospital</b>                                         |                               |
| Community                                                                   | Reference                     |
| Academic                                                                    | 0.70 (0.59 – 0.82)            |
| <b>Case volume of secondary hospital<sup>†</sup></b>                        |                               |
| Lower                                                                       | Reference                     |
| Higher                                                                      | 1.04 (0.86 – 1.25)            |

\* Adjusted for age, sex, neighborhood household income, hospitalizations in prior year, physician clinic visits in prior year, Charlson comorbidity score, chronic care facility residency at readmission, most responsible diagnosis at secondary hospitalization, arrival by ambulance at readmission, year of readmission, primary length of stay, hospital-free interval, and secondary hospital sector and case volume.

<sup>†</sup> Variables were analyzed as continuous data but are presented here in categorical format for interpretation.

<sup>‡</sup> Missing data was coded as such and included in the analysis. It was uncommon (<0.003%) and is not presented here.

<sup>§</sup> The five most dangerous and most protective diagnostic categories were selected for presentation here. For a full listing, see eTable 8.



**Table 3: Unadjusted Comparison of the Odds of 30-day Mortality Following Alternate-Hospital Readmission to the Odds of 30-day Mortality Following Original-Hospital Readmission, Stratified on Patient Characteristics**

| Characteristic                                                          | Unadjusted Odds Ratio (95% CI) |
|-------------------------------------------------------------------------|--------------------------------|
| <b>Age</b>                                                              |                                |
| <65 years                                                               | 1.36 (1.27 – 1.46)             |
| 65-74 years                                                             | 1.22 (1.11 – 1.33)             |
| 75-84 years                                                             | 1.16 (1.09 – 1.23)             |
| ≥85 years                                                               | 1.15 (1.07 – 1.23)             |
| <b>Sex</b>                                                              |                                |
| Female                                                                  | 1.35 (1.26 – 1.45)             |
| Male                                                                    | 1.16 (1.08 – 1.25)             |
| <b>Neighborhood household income</b>                                    |                                |
| Highest quintile                                                        | 1.27 (1.14 – 1.42)             |
| Next highest quintile                                                   | 1.22 (1.11 – 1.33)             |
| Middle quintile                                                         | 1.23 (1.13 – 1.34)             |
| Next lowest quintile                                                    | 1.25 (1.17 – 1.34)             |
| Lowest quintile                                                         | 1.28 (1.19 – 1.37)             |
| <b>Charlson co-morbidity score</b>                                      |                                |
| ≤1                                                                      | 1.42 (1.24 – 1.63)             |
| >=2                                                                     | 1.17 (1.10 – 1.24)             |
| <b>Hospitalizations in prior year</b>                                   |                                |
| 1                                                                       | 1.46 (1.35 – 1.58)             |
| ≥2                                                                      | 1.09 (1.01 – 1.18)             |
| <b>Physician clinic visits in prior year</b>                            |                                |
| ≤6                                                                      | 1.32 (1.21 – 1.43)             |
| ≥7                                                                      | 1.23 (1.15 – 1.32)             |
| <b>Most responsible diagnosis for secondary hospitalization*</b>        |                                |
| Injury                                                                  | 2.27 (1.72 – 2.99)             |
| Diverticular disease                                                    | 2.25 (1.43 – 3.55)             |
| Intestinal obstruction                                                  | 1.80 (1.32 – 2.45)             |
| Abdominal pain                                                          | 1.61 (0.61 – 4.23)             |
| Infections of the skin                                                  | 1.53 (1.00 – 2.35)             |
| Acute coronary syndrome                                                 | 0.93 (0.80 – 1.07)             |
| Venous thromboembolism                                                  | 0.89 (0.67 – 1.19)             |
| Chest pain not otherwise specified                                      | 0.75 (0.29 – 1.90)             |
| Syncope and collapse                                                    | 0.64 (0.25 – 1.63)             |
| Chronic ischemic heart disease                                          | 0.52 (0.35 – 0.76)             |
| <b>Primary hospitalization length of stay longer than cohort median</b> |                                |
| No                                                                      | 1.26 (1.16 – 1.36)             |
| Yes                                                                     | 1.25 (1.15 – 1.35)             |
| <b>Hospital-free interval longer than cohort median</b>                 |                                |
| No                                                                      | 1.30 (1.19 – 1.42)             |
| Yes                                                                     | 1.20 (1.13 – 1.27)             |
| <b>Resident of chronic care facility at readmission date</b>            |                                |
| No                                                                      | 1.25 (1.17 – 1.33)             |
| Yes                                                                     | 0.99 (0.89 – 1.11)             |
| <b>Arrival by ambulance at readmission</b>                              |                                |
| No                                                                      | 1.19 (1.07 – 1.31)             |
| Yes                                                                     | 1.02 (0.96 – 1.08)             |

\* The ten diagnostic groups with the most extreme effect (five with the greatest augmentation and the five with the greatest mitigation) on the unadjusted risk of 30-day mortality with alternate-hospital readmission were selected for presentation here. For a full listing of unadjusted results stratified by secondary hospitalization diagnosis, see eTable 10.



Figure 1: Patient Flow Diagram

Figure 1: Patient Flow Diagram

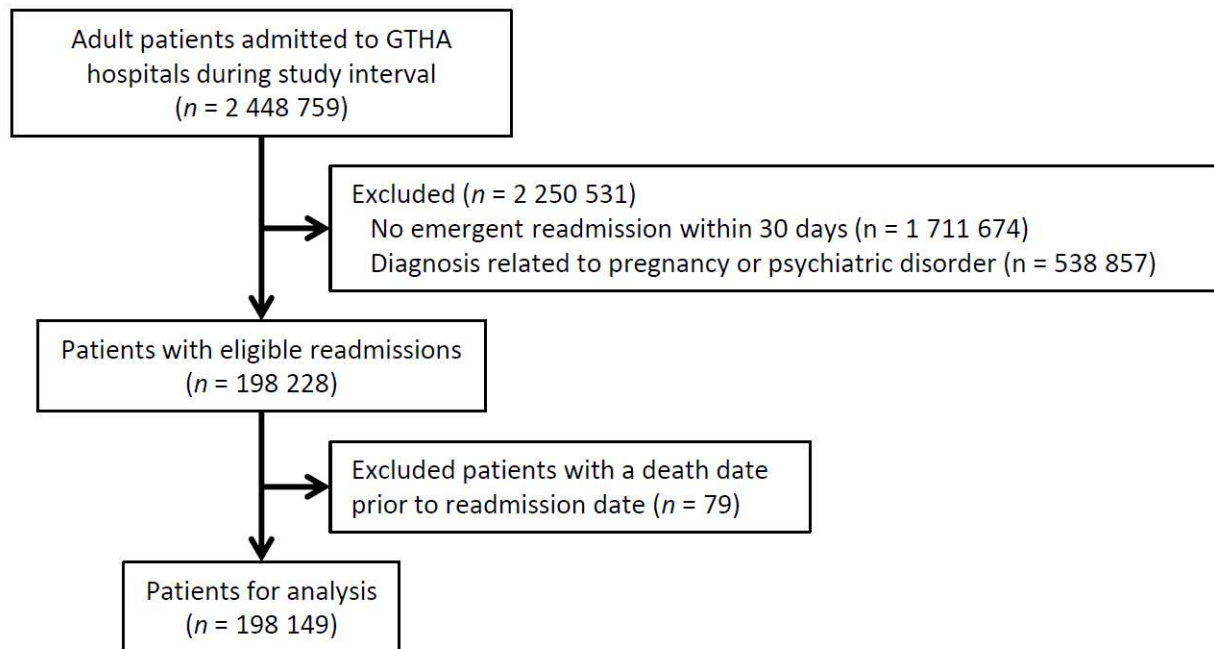

Figure 2: Odds Ratios for 30-day Mortality, Stratified by Secondary Hospital

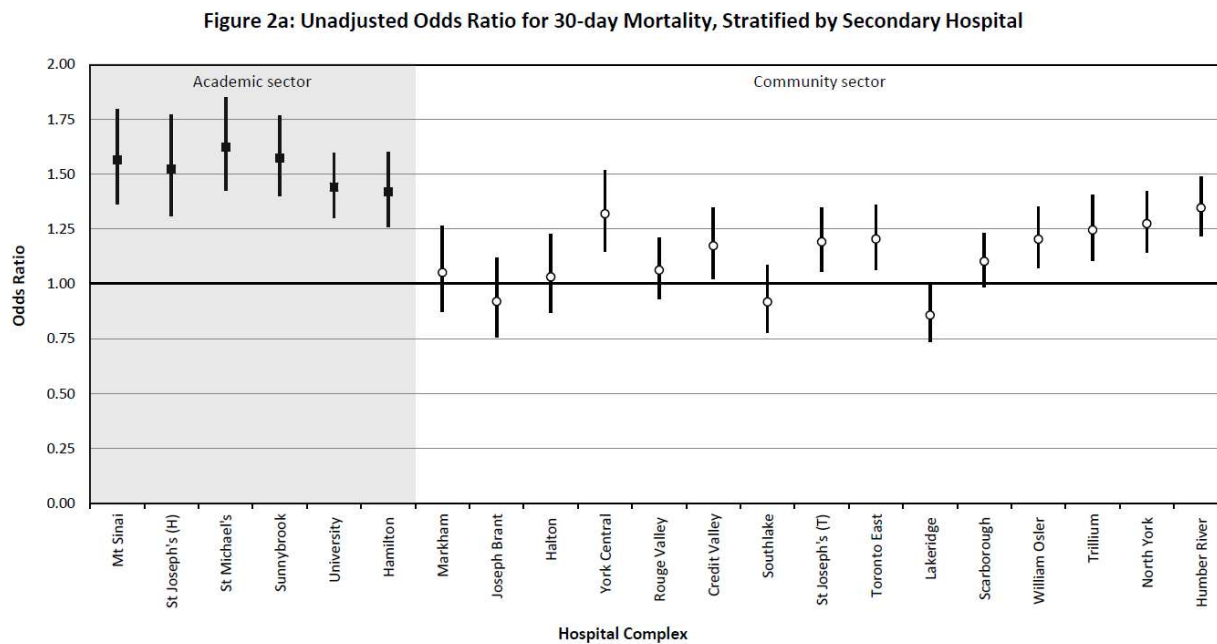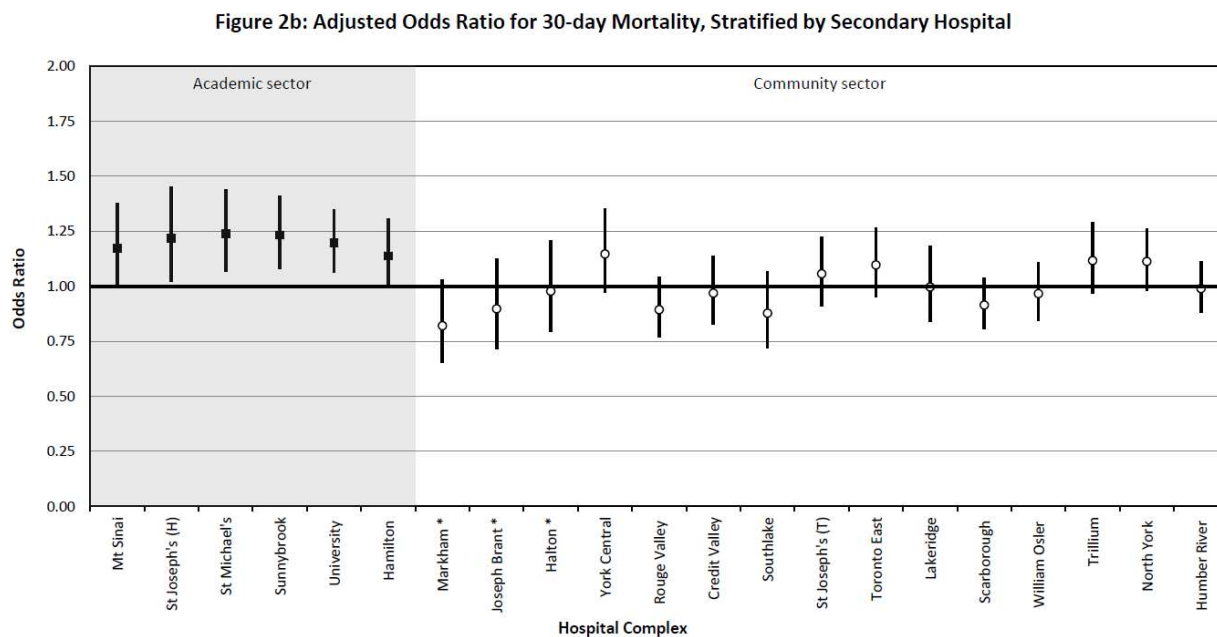

Legend: Data points represent the hospital-specific odds ratio comparing the odds of death within 30 days of alternate-hospital readmission to the odds of death within 30 days of original-hospital readmission. For this stratification, patients were assigned to their secondary (ie readmission) hospital. Black square data points indicate academic sector hospitals. White circle data points indicate community sector hospitals. Vertical lines represent the 95% confidence interval for the associated data point. Multivariate logistic regression produces unstable estimates due to nonconvergence for the hospitals marked with asterisks.

Figure 3: Unadjusted Survival of Patients Following Readmission

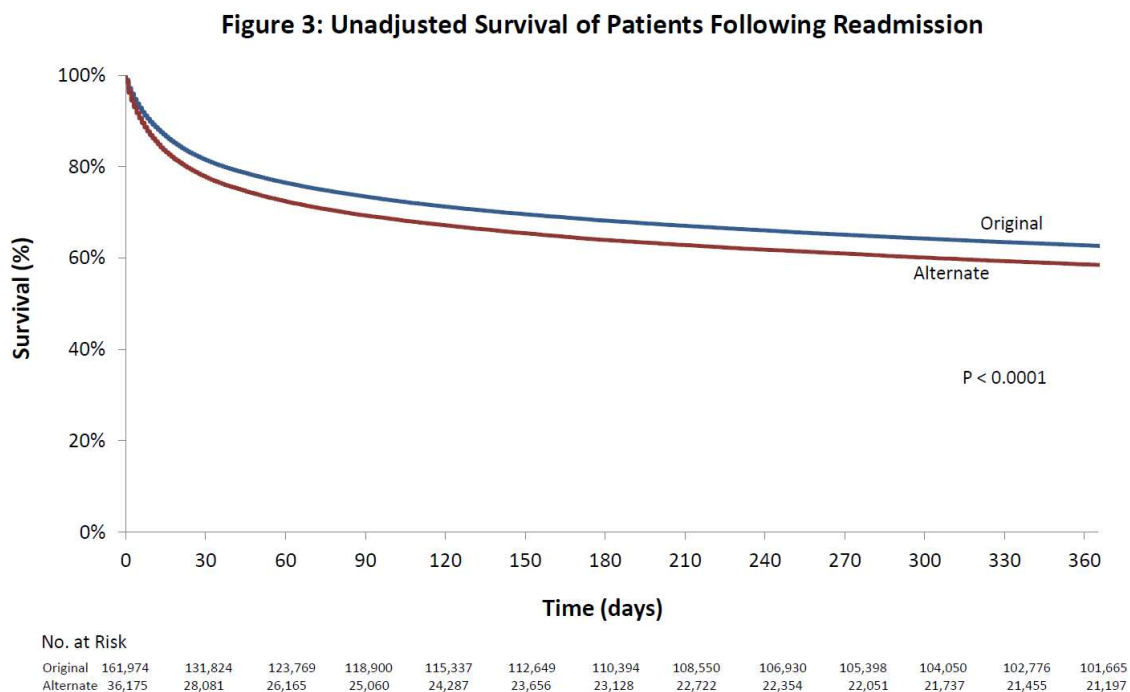

1  
2  
3  
4  
5  
6  
7  
8  
9  
10  
11  
12  
13  
14  
15  
16  
17  
18  
19  
20  
21  
22  
23  
24  
25  
26  
27  
28  
29  
30  
31  
32  
33  
34  
35  
36  
37  
38  
39  
40  
41  
42  
43  
44  
45  
46  
47  
48  
49  
50  
51  
52  
53  
54  
55  
56  
57  
58  
59  
60

Site of Hospital Readmission and Mortality:

On-Line Only Material

John A. Staples

Deva Thiruchelvam

Donald A. Redelmeier

Confidential

**Site of Hospital Readmission and Mortality:**

**On-Line Only Material**

**Table of Contents**

|                                                                             |         |
|-----------------------------------------------------------------------------|---------|
| eTable 1: Diagnostic Categories                                             | Page 2  |
| eTable 2: Hospital Characteristics for Analysis                             | Page 10 |
| eTable 3: Hospital Characteristics for Description                          | Page 11 |
| eTable 4: Diagnostic Category Frequency for Primary Hospitalization         | Page 12 |
| eTable 5: Diagnostic Category Frequency for Secondary Hospitalization       | Page 13 |
| eTable 6: Secondary Hospital Characteristics                                | Page 14 |
| eTable 7: Diagnosis as Predictor of 30-day Mortality                        | Page 15 |
| eTable 8: Primary Analysis Stratified by Secondary Hospital                 | Page 16 |
| eTable 9: Primary Analysis Stratified by Hospital Transitions               | Page 17 |
| eTable 10: Primary Analysis, Without Adjustment, Stratified on Diagnosis    | Page 18 |
| eTable 11: Analysis of Secondary Outcomes                                   | Page 19 |
| eTable 12: Influence of an Unmeasured Confounder (HR 2.0)                   | Page 20 |
| eFigure 1: Study Schematic                                                  | Page 21 |
| eFigure 2: Hospital Flow Diagram                                            | Page 22 |
| eFigure 3: Frequency Table for the Number of Eligible Hospital Readmissions | Page 23 |
| eFigure 4: Comparing Primary and Secondary Hospital Stratification          | Page 24 |

**eTable 1: Diagnostic Categories**

| <b>Category</b>                 | <b>Clinical Classifications Software (CCS)<sup>37</sup> Components</b>                                                                                                                                    |
|---------------------------------|-----------------------------------------------------------------------------------------------------------------------------------------------------------------------------------------------------------|
| Nonspecific abdominal pain      | Abdominal pain                                                                                                                                                                                            |
| Acute coronary syndrome         | Acute myocardial infarction                                                                                                                                                                               |
| Acute renal failure             | Acute and unspecified renal failure                                                                                                                                                                       |
| Appendicitis                    | Appendicitis and other appendiceal conditions                                                                                                                                                             |
| Cardiac dysrhythmias            | Conduction disorders<br>Cardiac dysrhythmias                                                                                                                                                              |
| Biliary tract disease           | Biliary tract disease                                                                                                                                                                                     |
| Cardiac arrest                  | Cardiac arrest and ventricular fibrillation                                                                                                                                                               |
| Cerebrovascular disease         | Acute cerebrovascular disease<br>Occlusion or stenosis of precerebral arteries<br>Other and ill-defined cerebrovascular disease<br>Transient cerebral ischemia<br>Late effects of cerebrovascular disease |
| Nonspecific chest pain          | Nonspecific chest pain                                                                                                                                                                                    |
| Chronic ischemic heart disease  | Coronary atherosclerosis and other heart disease                                                                                                                                                          |
| Diabetes                        | Diabetes mellitus without complication<br>Diabetes mellitus with complications                                                                                                                            |
| Diverticular disease            | Diverticulosis and diverticulitis                                                                                                                                                                         |
| Fluid and electrolyte imbalance | Fluid and electrolyte disorders                                                                                                                                                                           |
| Gastrointestinal hemorrhage     | Gastrointestinal hemorrhage<br>Gastroduodenal ulcer (except hemorrhage)                                                                                                                                   |
| Heart failure                   | Congestive heart failure; nonhypertensive                                                                                                                                                                 |
| Infections of the skin          | Skin and subcutaneous tissue infections                                                                                                                                                                   |
| Inflammatory bowel disease      | Regional enteritis and ulcerative colitis                                                                                                                                                                 |

**eTable 1: Diagnostic Categories (continued)**

| Category | Clinical Classifications Software (CCS) <sup>37</sup> Components                                                                                                                                                                                                                                                                                                                                                                                                                                                                                                                                                                                                                                                                                                                                                                                                                                                                                                                                                                                                                                                                                                                                                                                                                                                                                                                                                                                                                                                                                   |
|----------|----------------------------------------------------------------------------------------------------------------------------------------------------------------------------------------------------------------------------------------------------------------------------------------------------------------------------------------------------------------------------------------------------------------------------------------------------------------------------------------------------------------------------------------------------------------------------------------------------------------------------------------------------------------------------------------------------------------------------------------------------------------------------------------------------------------------------------------------------------------------------------------------------------------------------------------------------------------------------------------------------------------------------------------------------------------------------------------------------------------------------------------------------------------------------------------------------------------------------------------------------------------------------------------------------------------------------------------------------------------------------------------------------------------------------------------------------------------------------------------------------------------------------------------------------|
| Injury   | Joint disorders and dislocations; trauma-related<br>Fracture of neck of femur (hip)<br>Spinal cord injury<br>Skull and face fractures<br>Fracture of upper limb<br>Fracture of lower limb<br>Other fractures<br>Sprains and strains<br>Intracranial injury<br>Crushing injury or internal injury<br>Open wounds of head; neck; and trunk<br>Open wounds of extremities<br>Complication of device; implant or graft<br>Complications of surgical procedures or medical care<br>Superficial injury; contusion<br>Burns<br>Poisoning by psychotropic agents<br>Poisoning by other medications and drugs<br>Poisoning by nonmedicinal substances<br>Suicide and intentional self-inflicted injury [ICD-9CM CCS only]<br>Other injuries and conditions due to external causes<br>E Codes: All (external causes of injury and poisoning)<br>E Codes: Cut/pierce<br>E Codes: Drowning/submersion<br>E Codes: Fall<br>E Codes: Fire/burn<br>E Codes: Firearm<br>E Codes: Machinery<br>E Codes: Motor vehicle traffic (MVT)<br>E Codes: Pedal cyclist; not MVT<br>E Codes: Pedestrian; not MVT<br>E Codes: Transport; not MVT<br>E Codes: Natural/environment<br>E Codes: Overexertion<br>E Codes: Poisoning<br>E Codes: Struck by; against<br>E Codes: Suffocation<br>E Codes: Adverse effects of medical care<br>E Codes: Adverse effects of medical drugs<br>E Codes: Other specified and classifiable<br>E Codes: Other specified; NEC [ICD-9CM CCS only]<br>E Codes: Unspecified [ICD-9CM CCS only]<br>E Codes: Place of occurrence [ICD-9CM CCS only] |

**eTable 1: Diagnostic Categories (continued)**

| Category                 | Clinical Classifications Software (CCS) <sup>37</sup> Components                                                                                                                                                                                                                                                                                                                                                                                                                                                                                                                                                                                                                                                    |
|--------------------------|---------------------------------------------------------------------------------------------------------------------------------------------------------------------------------------------------------------------------------------------------------------------------------------------------------------------------------------------------------------------------------------------------------------------------------------------------------------------------------------------------------------------------------------------------------------------------------------------------------------------------------------------------------------------------------------------------------------------|
| Intestinal obstruction   | Intestinal obstruction without hernia<br>Abdominal hernia [only those codes that specify intestinal obstruction]                                                                                                                                                                                                                                                                                                                                                                                                                                                                                                                                                                                                    |
| Liver disease            | Liver disease; alcohol-related<br>Other liver diseases<br>Hepatitis                                                                                                                                                                                                                                                                                                                                                                                                                                                                                                                                                                                                                                                 |
| Nephrolithiasis          | Calculus of urinary tract                                                                                                                                                                                                                                                                                                                                                                                                                                                                                                                                                                                                                                                                                           |
| Obstructive lung disease | Chronic obstructive pulmonary disease and bronchiectasis<br>Asthma                                                                                                                                                                                                                                                                                                                                                                                                                                                                                                                                                                                                                                                  |
| Pneumonia                | Pneumonia (except that caused by tuberculosis or sexually transmitted disease)<br>Influenza<br>Aspiration pneumonitis; food/vomitus                                                                                                                                                                                                                                                                                                                                                                                                                                                                                                                                                                                 |
| Prostatic hypertrophy    | Hyperplasia of prostate                                                                                                                                                                                                                                                                                                                                                                                                                                                                                                                                                                                                                                                                                             |
| Sepsis                   | Septicemia (except in labor)                                                                                                                                                                                                                                                                                                                                                                                                                                                                                                                                                                                                                                                                                        |
| Syncope                  | Syncope                                                                                                                                                                                                                                                                                                                                                                                                                                                                                                                                                                                                                                                                                                             |
| Urinary tract infection  | Urinary tract infections                                                                                                                                                                                                                                                                                                                                                                                                                                                                                                                                                                                                                                                                                            |
| Venous thromboembolism   | Phlebitis; thrombophlebitis and thromboembolism                                                                                                                                                                                                                                                                                                                                                                                                                                                                                                                                                                                                                                                                     |
| Malignant neoplasm       | Cancer of head and neck<br>Cancer of esophagus<br>Cancer of stomach<br>Cancer of colon<br>Cancer of rectum and anus<br>Cancer of liver and intrahepatic bile duct<br>Cancer of pancreas<br>Cancer of other GI organs; peritoneum<br>Cancer of bronchus; lung<br>Cancer; other respiratory and intrathoracic<br>Cancer of bone and connective tissue<br>Melanomas of skin<br>Cancer of breast<br>Cancer of uterus<br>Cancer of cervix<br>Cancer of ovary<br>Cancer of other female genital organs<br>Cancer of prostate<br>Cancer of testis<br>Cancer of other male genital organs<br>Cancer of bladder<br>Cancer of kidney and renal pelvis<br>Cancer of other urinary organs<br>Cancer of brain and nervous system |



**eTable 1: Diagnostic Categories (continued)**

| Category                       | Clinical Classifications Software (CCS) <sup>37</sup> Components                                                                                                                                                                                                                                                                                                                                                                                                                                                                                                                                                                                                                                                                                                                                                                            |
|--------------------------------|---------------------------------------------------------------------------------------------------------------------------------------------------------------------------------------------------------------------------------------------------------------------------------------------------------------------------------------------------------------------------------------------------------------------------------------------------------------------------------------------------------------------------------------------------------------------------------------------------------------------------------------------------------------------------------------------------------------------------------------------------------------------------------------------------------------------------------------------|
| Malignant neoplasm (continued) | Cancer of thyroid<br>Hodgkin`s disease<br>Non-Hodgkin`s lymphoma<br>Leukemias<br>Multiple myeloma<br>Cancer; other and unspecified primary<br>Secondary malignancies<br>Malignant neoplasm without specification of site<br>Neoplasms of unspecified nature or uncertain behavior<br>Maintenance chemotherapy; radiotherapy                                                                                                                                                                                                                                                                                                                                                                                                                                                                                                                 |
| Miscellaneous                  | Overall<br>No diagnosis<br>Invalid diagnosis<br>Tuberculosis<br>Bacterial infection; unspecified site<br>Mycoses<br>HIV infection<br>Viral infection<br>Other infections; including parasitic<br>Sexually transmitted infections (not HIV or hepatitis)<br>Immunizations and screening for infectious disease<br>Thyroid disorders<br>Benign neoplasm of uterus<br>Other and unspecified benign neoplasm<br>Other endocrine disorders<br>Nutritional deficiencies<br>Disorders of lipid metabolism<br>Gout and other crystal arthropathies<br>Cystic fibrosis<br>Immunity disorders<br>Other nutritional; endocrine; and metabolic disorders<br>Deficiency and other anemia<br>Acute posthemorrhagic anemia<br>Sickle cell anemia<br>Coagulation and hemorrhagic disorders<br>Diseases of white blood cells<br>Other hematologic conditions |

**eTable 1: Diagnostic Categories (continued)**

| Category                  | Clinical Classifications Software (CCS) <sup>37</sup> Components                                                                                                                                                                                                                                                                                                                                                                                                                                                                                                                                                                                                                                                                                                                                                                                                                                                                                                                                                                                                                                                                                                                                                                                                                                                                                                                                                                                                                                                                                                                                                                                                                                                                                                                                                                                                                                                                                                                                                                                                                                                                          |
|---------------------------|-------------------------------------------------------------------------------------------------------------------------------------------------------------------------------------------------------------------------------------------------------------------------------------------------------------------------------------------------------------------------------------------------------------------------------------------------------------------------------------------------------------------------------------------------------------------------------------------------------------------------------------------------------------------------------------------------------------------------------------------------------------------------------------------------------------------------------------------------------------------------------------------------------------------------------------------------------------------------------------------------------------------------------------------------------------------------------------------------------------------------------------------------------------------------------------------------------------------------------------------------------------------------------------------------------------------------------------------------------------------------------------------------------------------------------------------------------------------------------------------------------------------------------------------------------------------------------------------------------------------------------------------------------------------------------------------------------------------------------------------------------------------------------------------------------------------------------------------------------------------------------------------------------------------------------------------------------------------------------------------------------------------------------------------------------------------------------------------------------------------------------------------|
| Miscellaneous (continued) | <p>Adjustment disorders [ICD-9CM CCS only]</p> <p>Anxiety disorders [ICD-9CM CCS only]</p> <p>Anxiety; somatoform; dissociative; and personality disorders [ICD-10-CM CCS only]</p> <p>Attention-deficit, conduct, and disruptive behavior disorders [ICD-9CM CCS only]</p> <p>Delirium, dementia, and amnesic and other cognitive disorders [ICD-9CM CCS only]</p> <p>Senility and organic mental disorders [ICD-10-CM CCS only]</p> <p>Developmental disorders [ICD-9CM CCS only]</p> <p>Mental retardation [ICD-10-CM CCS only]</p> <p>Disorders usually diagnosed in infancy, childhood, or adolescence [ICD-9CM CCS only]</p> <p>Preadult disorders [ICD-10-CM CCS only]</p> <p>Impulse control disorders, NEC [ICD-9CM CCS only]</p> <p>Mood disorders [ICD-9CM CCS only]</p> <p>Affective disorders [ICD-10-CM CCS only]</p> <p>Personality disorders [ICD-9CM CCS only]</p> <p>Schizophrenia and other psychotic disorders [ICD-9CM CCS only]</p> <p>Schizophrenia and related disorders [ICD-10-CM CCS only]</p> <p>Other psychoses [ICD-10-CM CCS only]</p> <p>Alcohol-related disorders [ICD-9CM CCS only]</p> <p>Alcohol-related mental disorders [ICD-10-CM CCS only]</p> <p>Substance-related disorders [ICD-9CM CCS only]</p> <p>Substance-related mental disorders [ICD-10-CM CCS only]</p> <p>Screening and history of mental health and substance abuse codes [ICD-9CM CCS only]</p> <p>Other mental conditions [ICD-10-CM CCS only]</p> <p>Personal history of mental disorder; mental and behavioral problems; observation and screening for mental condition [ICD-10-CM CCS only]</p> <p>Miscellaneous disorders [ICD-9CM CCS only]</p> <p>Meningitis (except that caused by tuberculosis or sexually transmitted disease)</p> <p>Encephalitis (except that caused by tuberculosis or sexually transmitted disease)</p> <p>Other CNS infection and poliomyelitis</p> <p>Parkinson`s disease</p> <p>Multiple sclerosis</p> <p>Other hereditary and degenerative nervous system conditions</p> <p>Paralysis</p> <p>Epilepsy; convulsions</p> <p>Headache; including migraine</p> <p>Coma; stupor; and brain damage</p> |

**eTable 1: Diagnostic Categories (continued)**

| Category                  | Clinical Classifications Software (CCS) <sup>37</sup> Components                                                                                                                                                                                                                                                                                                                                                                                                                                                                                                                                                                                                                                                                                                                                                                                                                                                                                                                                                                                                                                                                                                                                                                                                                                                                                                                                                                                                                                                                                                                                    |
|---------------------------|-----------------------------------------------------------------------------------------------------------------------------------------------------------------------------------------------------------------------------------------------------------------------------------------------------------------------------------------------------------------------------------------------------------------------------------------------------------------------------------------------------------------------------------------------------------------------------------------------------------------------------------------------------------------------------------------------------------------------------------------------------------------------------------------------------------------------------------------------------------------------------------------------------------------------------------------------------------------------------------------------------------------------------------------------------------------------------------------------------------------------------------------------------------------------------------------------------------------------------------------------------------------------------------------------------------------------------------------------------------------------------------------------------------------------------------------------------------------------------------------------------------------------------------------------------------------------------------------------------|
| Miscellaneous (continued) | Cataract<br>Retinal detachments; defects; vascular occlusion; and retinopathy<br>Glaucoma<br>Blindness and vision defects<br>Inflammation; infection of eye (except that caused by tuberculosis or sexually transmitted disease)<br>Other eye disorders<br>Otitis media and related conditions<br>Conditions associated with dizziness or vertigo<br>Other ear and sense organ disorders<br>Other nervous system disorders<br>Heart valve disorders<br>Peri-; endo-; and myocarditis; cardiomyopathy (except that caused by tuberculosis or sexually transmitted disease)<br>Essential hypertension<br>Hypertension with complications and secondary hypertension<br>Pulmonary heart disease<br>Other and ill-defined heart disease<br>Peripheral and visceral atherosclerosis<br>Aortic; peripheral; and visceral artery aneurysms<br>Aortic and peripheral arterial embolism or thrombosis<br>Other circulatory disease<br>Varicose veins of lower extremity<br>Hemorrhoids<br>Other diseases of veins and lymphatics<br>Acute and chronic tonsillitis<br>Acute bronchitis<br>Other upper respiratory infections<br>Pleurisy; pneumothorax; pulmonary collapse<br>Respiratory failure; insufficiency; arrest (adult)<br>Lung disease due to external agents<br>Other lower respiratory disease<br>Other upper respiratory disease<br>Intestinal infection<br>Disorders of teeth and jaw<br>Diseases of mouth; excluding dental<br>Esophageal disorders<br>Gastritis and duodenitis<br>Other disorders of stomach and duodenum<br>Anal and rectal conditions<br>Peritonitis and intestinal abscess |

**eTable 1: Diagnostic Categories (continued)**

| Category                  | Clinical Classifications Software (CCS) <sup>37</sup> Components                                                                                                                                                                                                                                                                                                                                                                                                                                                                                                                                                                                                                                                                                                                                                                                                                                                                                                                                                                                                                                                                                                                                                                                                                                                                                                                                                                                   |
|---------------------------|----------------------------------------------------------------------------------------------------------------------------------------------------------------------------------------------------------------------------------------------------------------------------------------------------------------------------------------------------------------------------------------------------------------------------------------------------------------------------------------------------------------------------------------------------------------------------------------------------------------------------------------------------------------------------------------------------------------------------------------------------------------------------------------------------------------------------------------------------------------------------------------------------------------------------------------------------------------------------------------------------------------------------------------------------------------------------------------------------------------------------------------------------------------------------------------------------------------------------------------------------------------------------------------------------------------------------------------------------------------------------------------------------------------------------------------------------|
| Miscellaneous (continued) | Pancreatic disorders (not diabetes)<br>Noninfectious gastroenteritis<br>Other gastrointestinal disorders<br>Nephritis; nephrosis; renal sclerosis<br>Chronic renal failure<br>Other diseases of kidney and ureters<br>Other diseases of bladder and urethra<br>Genitourinary symptoms and ill-defined conditions<br>Inflammatory conditions of male genital organs<br>Other male genital disorders<br>Nonmalignant breast conditions<br>Inflammatory diseases of female pelvic organs<br>Endometriosis<br>Prolapse of female genital organs<br>Menstrual disorders<br>Ovarian cyst<br>Menopausal disorders<br>Female infertility<br>Other female genital disorders<br>Contraceptive and procreative management<br>Spontaneous abortion<br>Induced abortion<br>Postabortion complications<br>Ectopic pregnancy<br>Other complications of pregnancy<br>Hemorrhage during pregnancy; abruptio placenta; placenta previa<br>Hypertension complicating pregnancy; childbirth and the puerperium<br>Early or threatened labor<br>Prolonged pregnancy<br>Diabetes or abnormal glucose tolerance complicating pregnancy; childbirth; or the puerperium<br>Malposition; malpresentation<br>Fetopelvic disproportion; obstruction<br>Previous C-section<br>Fetal distress and abnormal forces of labor<br>Polyhydramnios and other problems of amniotic cavity<br>Umbilical cord complication<br>OB-related trauma to perineum and vulva<br>Forceps delivery |

**eTable 1: Diagnostic Categories (continued)**

| Category                  | Clinical Classifications Software (CCS) <sup>37</sup> Components                                                                                                                                                                                                                                                                                                                                                                                                                                                                                                                                                                                                                                                                                                                                                                                                                                                                                                                                                                                                                                                                                                                                                                                                                                                                                                                                                                                                                                                                                                                                                                          |
|---------------------------|-------------------------------------------------------------------------------------------------------------------------------------------------------------------------------------------------------------------------------------------------------------------------------------------------------------------------------------------------------------------------------------------------------------------------------------------------------------------------------------------------------------------------------------------------------------------------------------------------------------------------------------------------------------------------------------------------------------------------------------------------------------------------------------------------------------------------------------------------------------------------------------------------------------------------------------------------------------------------------------------------------------------------------------------------------------------------------------------------------------------------------------------------------------------------------------------------------------------------------------------------------------------------------------------------------------------------------------------------------------------------------------------------------------------------------------------------------------------------------------------------------------------------------------------------------------------------------------------------------------------------------------------|
| Miscellaneous (continued) | Other complications of birth; puerperium affecting management of mother<br>Normal pregnancy and/or delivery<br>Other inflammatory condition of skin<br>Chronic ulcer of skin<br>Other skin disorders<br>Infective arthritis and osteomyelitis (except that caused by tuberculosis or sexually transmitted disease)<br>Rheumatoid arthritis and related disease<br>Osteoarthritis<br>Other non-traumatic joint disorders<br>Spondylosis; intervertebral disc disorders; other back problems<br>Osteoporosis<br>Pathological fracture<br>Acquired foot deformities<br>Other acquired deformities<br>Systemic lupus erythematosus and connective tissue disorders<br>Other connective tissue disease<br>Other bone disease and musculoskeletal deformities<br>Cardiac and circulatory congenital anomalies<br>Digestive congenital anomalies<br>Genitourinary congenital anomalies<br>Nervous system congenital anomalies<br>Other congenital anomalies<br>Liveborn<br>Short gestation; low birth weight; and fetal growth retardation<br>Intrauterine hypoxia and birth asphyxia<br>Respiratory distress syndrome<br>Hemolytic jaundice and perinatal jaundice<br>Birth trauma<br>Other perinatal conditions<br>Fever of unknown origin<br>Lymphadenitis<br>Gangrene<br>Shock<br>Nausea and vomiting<br>Malaise and fatigue<br>Allergic reactions<br>Rehabilitation care; fitting of prostheses; and adjustment of devices<br>Administrative/social admission<br>Medical examination/evaluation<br>Other aftercare<br>Other screening for suspected conditions (not mental disorders or infectious disease)<br>Residual codes; unclassified |

**eTable 2: Hospital Characteristics for Analysis**<sup>29,44,45,46,56</sup>

| Hospital                | Inpatient Acute-care Sites                                                               | Size* (beds) | Case Volume <sup>†</sup> (discharges/y) |
|-------------------------|------------------------------------------------------------------------------------------|--------------|-----------------------------------------|
| <b>Academic Sector</b>  |                                                                                          |              |                                         |
| Mt Sinai                | Mount Sinai Hospital                                                                     | 222          | 24,738                                  |
| St Joseph's (H)         | St Joseph's Health Care System (Hamilton)                                                | 256          | 19,881                                  |
| St Michael's            | St Michael's Hospital                                                                    | 402          | 24,954                                  |
| Sunnybrook              | Sunnybrook Health Sciences Centre                                                        | 438          | 29,049                                  |
| University              | University Health Network: Princess Margaret, Toronto General, and Toronto Western sites | 639          | 29,072                                  |
| Hamilton                | Hamilton Health Sciences Corporation: General, Juravinski, and McMaster sites            | 559          | 39,849                                  |
| <b>Community Sector</b> |                                                                                          |              |                                         |
| Markham                 | Markham Stouffville Hospital                                                             | 111          | 11,479                                  |
| Joseph Brant            | Joseph Brant Memorial Hospital                                                           | 167          | 13,152                                  |
| Halton                  | Halton Healthcare Services Corporation: Milton and Oakville sites                        | 188          | 16,731                                  |
| York Central            | York Central Hospital                                                                    | 167          | 14,677                                  |
| Rouge Valley            | Rouge Valley Health System: Centenary and Ajax sites                                     | 259          | 24,697                                  |
| Credit Valley           | Credit Valley Hospital                                                                   | 208          | 21,186                                  |
| Southlake               | Southlake Regional Health Centre                                                         | 164          | 16,080                                  |
| St Joseph's (T)         | St Joseph's Health Centre (Toronto)                                                      | 259          | 17,681                                  |
| Toronto East            | Toronto East General Hospital                                                            | 249          | 18,801                                  |
| Lakeridge               | Lakeridge Health Corporation: Bowmanville, Oshawa, Port Perry, and Uxbridge sites        | 329          | 25,374                                  |
| Scarborough             | Scarborough Hospital: General and Grace sites                                            | 453          | 34,570                                  |
| William Osler           | William Osler Health System: Brampton, Etobicoke, and Georgetown sites                   | 343          | 40,856                                  |
| Trillium                | Trillium Health Centre (Mississauga)                                                     | 328          | 30,693                                  |
| North York              | North York General Hospital: General and Branson sites                                   | 255          | 27,137                                  |
| Humber River            | Humber River Regional Hospital: Humber Memorial, Northwestern, and York-Finch sites      | 433          | 29,138                                  |

\* Size reflects the number of medical and surgical adult acute care in-patient beds reported for the hospital in 2002.

† Case volume reflects the total number of separations reported for the hospital in 2002.

**eTable 3: Hospital Characteristics for Description\*** 29,44,45,46

| Hospital                | Established (year) | Religious Affiliation | Annual Budget (million \$CAD) | Average Length of Stay (days) | Myocardial Infarction 28-day Readmission Rate* (%) | Use of Clinical Information Technology† (%) | Patient Assessment of Quality of Care† (%) |
|-------------------------|--------------------|-----------------------|-------------------------------|-------------------------------|----------------------------------------------------|---------------------------------------------|--------------------------------------------|
| <b>Academic Sector</b>  |                    |                       |                               |                               |                                                    |                                             |                                            |
| Mt Sinai                | 1923               | Yes                   | 184                           | 6.0                           | 5.9                                                | 60.1                                        | 89.8                                       |
| St Joseph's (H)         | 1890               | Yes                   | 158                           | 6.7                           | 7.5                                                | 60.1                                        | 89.8                                       |
| St Michael's            | 1892               | Yes                   | 370                           | 7.0                           | 5.9                                                | 47.6                                        | 87.6                                       |
| Sunnybrook              | 1948               | No                    | 400                           | 8.0                           | 3.8                                                | 74.8                                        | 87.6                                       |
| University              | 1829               | No                    | 650                           | 7.5                           | 3.8                                                | 74.8                                        | 87.6                                       |
| Hamilton                | 1848               | No                    | 530                           | 7.9                           | 5.9                                                | 47.6                                        | 89.8                                       |
| <b>Community Sector</b> |                    |                       |                               |                               |                                                    |                                             |                                            |
| Markham                 | 1990               | No                    | 60                            | 6.0                           | 7.5                                                | 60.1                                        | 89.8                                       |
| Joseph Brant            | 1961               | No                    | 73                            | 6.6                           | 5.9                                                | 25.0                                        | 87.6                                       |
| Halton                  | 1949               | No                    | 132                           | 5.8                           | 10.1                                               | 60.1                                        | 89.8                                       |
| York Central            | 1963               | No                    | 77                            | 6.5                           | 7.5                                                | 60.1                                        | 82.0                                       |
| Rouge Valley            | 1954               | No                    | 189                           | 6.4                           | 7.5                                                | 47.6                                        | 87.6                                       |
| Credit Valley           | 1985               | No                    | 170                           | 7.5                           | 10.1                                               | 74.8                                        | 87.6                                       |
| Southlake               | 1922               | No                    | 98                            | 5.0                           | 10.1                                               | 47.6                                        | 92.2                                       |
| St Joseph's (T)         | 1921               | Yes                   | 142                           | 5.8                           | 7.5                                                | 47.6                                        | 87.6                                       |
| Toronto East            | 1929               | No                    | 127                           | 7.2                           | 5.9                                                | 60.1                                        | 85.8                                       |
| Lakeridge               | 1946               | No                    | 183                           | 5.6                           | 7.5                                                | 74.8                                        | 85.8                                       |
| Scarborough             | 1956               | Yes                   | 231                           | 6.6                           | 10.1                                               | 60.1                                        | 82.0                                       |
| William Osler           | 1961               | No                    | 165                           | 3.5                           | 5.9                                                | 74.8                                        | 82.0                                       |
| Trillium                | 1958               | No                    | 194                           | 6.0                           | 3.8                                                | 74.8                                        | 82.0                                       |
| North York              | 1957               | No                    | 254                           | 5.0                           | 3.8                                                | 60.1                                        | 87.6                                       |
| Humber River            | 1948               | No                    | 141                           | 6.6                           | 5.9                                                | 47.6                                        | 82.0                                       |

\* Data from study midpoint (2002 where possible, 2004 otherwise).

†Data reported as a range in the source rather than a point estimate. The midpoint of the reported range is presented here.

**eTable 4: Diagnostic Category Frequency for Primary Hospitalization**

| Most Responsible Diagnosis for Primary Hospitalization | Original Hospital Readmission (n = 161,974) | Alternate Hospital Readmission (n = 36,175) |
|--------------------------------------------------------|---------------------------------------------|---------------------------------------------|
| Miscellaneous                                          | 49,237 (30.4%)                              | 10,652 (29.4%)                              |
| Malignant neoplasm                                     | 19,590 (12.1%)                              | 4,303 (11.9%)                               |
| Injury                                                 | 10,666 (6.6%)                               | 2,724 (7.5%)                                |
| Acute coronary syndrome                                | 9,000 (5.6%)                                | 2,115 (5.8%)                                |
| Heart failure                                          | 9,258 (5.7%)                                | 1,856 (5.1%)                                |
| Pneumonia                                              | 6,696 (4.1%)                                | 1,588 (4.4%)                                |
| Obstructive lung disease                               | 6,742 (4.2%)                                | 1,316 (3.6%)                                |
| Chronic ischemic heart disease                         | 3,168 (2.0%)                                | 2,440 (6.7%)                                |
| Cardiac arrhythmia                                     | 4,318 (2.7%)                                | 824 (2.3%)                                  |
| Cerebrovascular disease                                | 3,708 (2.3%)                                | 1,135 (3.1%)                                |
| Biliary tract disease                                  | 4,172 (2.6%)                                | 463 (1.3%)                                  |
| Intestinal obstruction                                 | 3,709 (2.3%)                                | 465 (1.3%)                                  |
| Gastrointestinal hemorrhage                            | 3,202 (2.0%)                                | 597 (1.7%)                                  |
| Urinary tract infection                                | 2,905 (1.8%)                                | 761 (2.1%)                                  |
| Diabetes                                               | 2,844 (1.8%)                                | 674 (1.9%)                                  |
| Liver disease                                          | 2,560 (1.6%)                                | 531 (1.5%)                                  |
| Fluid and electrolyte imbalance                        | 2,223 (1.4%)                                | 565 (1.6%)                                  |
| Nonspecific chest pain                                 | 2,013 (1.2%)                                | 498 (1.4%)                                  |
| Nonspecific abdominal pain                             | 1,868 (1.2%)                                | 360 (1.0%)                                  |
| Acute renal failure                                    | 1,448 (0.9%)                                | 373 (1.0%)                                  |
| Infections of the skin                                 | 1,484 (0.9%)                                | 310 (0.9%)                                  |
| Sepsis                                                 | 1,491 (0.9%)                                | 285 (0.8%)                                  |
| Appendicitis                                           | 1,633 (1.0%)                                | 97 (0.3%)                                   |
| Diverticular disease                                   | 1,480 (0.9%)                                | 150 (0.4%)                                  |
| Venous thromboembolism                                 | 1,335 (0.8%)                                | 221 (0.6%)                                  |
| Nephrolithiasis                                        | 1,419 (0.9%)                                | 135 (0.4%)                                  |
| Inflammatory bowel disease                             | 1,381 (0.9%)                                | 172 (0.5%)                                  |
| Prostatic hypertrophy                                  | 1,225 (0.8%)                                | 173 (0.5%)                                  |
| Syncope and collapse                                   | 947 (0.6%)                                  | 290 (0.8%)                                  |
| Cardiac arrest                                         | 252 (0.2%)                                  | 102 (0.3%)                                  |



**eTable 5: Diagnostic Category Frequency for Secondary Hospitalization**

| Most Responsible Diagnosis for Secondary Hospitalization | Original Hospital Readmission (n = 161,974) | Alternate Hospital Readmission (n = 36,175) |
|----------------------------------------------------------|---------------------------------------------|---------------------------------------------|
| Miscellaneous                                            | 47,116 (29.1%)                              | 10,362 (28.6%)                              |
| Malignant neoplasm                                       | 13,085 (8.1%)                               | 2,802 (7.7%)                                |
| Injury                                                   | 20,194 (12.5%)                              | 2,888 (8.0%)                                |
| Acute coronary syndrome                                  | 6,648 (4.1%)                                | 1,933 (5.3%)                                |
| Heart failure                                            | 10,193 (6.3%)                               | 2,452 (6.8%)                                |
| Pneumonia                                                | 7,584 (4.7%)                                | 2,264 (6.3%)                                |
| Obstructive lung disease                                 | 5,855 (3.6%)                                | 1,177 (3.3%)                                |
| Chronic ischemic heart disease                           | 1,599 (1.0%)                                | 404 (1.1%)                                  |
| Cardiac arrhythmia                                       | 554 (0.3%)                                  | 203 (0.6%)                                  |
| Cerebrovascular disease                                  | 4,008 (2.5%)                                | 1,398 (3.9%)                                |
| Biliary tract disease                                    | 3,213 (2.0%)                                | 511 (1.4%)                                  |
| Intestinal obstruction                                   | 4,830 (3.0%)                                | 648 (1.8%)                                  |
| Gastrointestinal hemorrhage                              | 3,624 (2.2%)                                | 960 (2.7%)                                  |
| Urinary tract infection                                  | 3,370 (2.1%)                                | 866 (2.4%)                                  |
| Diabetes                                                 | 2,606 (1.6%)                                | 679 (1.9%)                                  |
| Liver disease                                            | 2,618 (1.6%)                                | 595 (1.6%)                                  |
| Fluid and electrolyte imbalance                          | 2,799 (1.7%)                                | 651 (1.8%)                                  |
| Nonspecific chest pain                                   | 3,149 (1.9%)                                | 1,094 (3.0%)                                |
| Nonspecific abdominal pain                               | 2,306 (1.4%)                                | 320 (0.9%)                                  |
| Acute renal failure                                      | 1,853 (1.1%)                                | 490 (1.4%)                                  |
| Infections of the skin                                   | 1,399 (0.9%)                                | 277 (0.8%)                                  |
| Sepsis                                                   | 2,805 (1.7%)                                | 788 (2.2%)                                  |
| Appendicitis                                             | 336 (0.2%)                                  | 61 (0.2%)                                   |
| Diverticular disease                                     | 1,033 (0.6%)                                | 149 (0.4%)                                  |
| Venous thromboembolism                                   | 2,426 (1.5%)                                | 605 (1.7%)                                  |
| Nephrolithiasis                                          | 1,053 (0.7%)                                | 110 (0.3%)                                  |
| Inflammatory bowel disease                               | 909 (0.6%)                                  | 150 (0.4%)                                  |
| Prostatic hypertrophy                                    | 201 (0.1%)                                  | 17 (0.0%)                                   |
| Syncope and collapse                                     | 988 (0.6%)                                  | 373 (1.0%)                                  |
| Cardiac arrest                                           | 554 (0.3%)                                  | 203 (0.6%)                                  |

**eTable 6: Secondary Hospital Characteristics**

| Characteristic*                                                                                                     | Original Hospital Readmission<br>(n = 161,974) | Alternate Hospital Readmission<br>(n = 36,175) |
|---------------------------------------------------------------------------------------------------------------------|------------------------------------------------|------------------------------------------------|
| <b>For Analysis</b>                                                                                                 |                                                |                                                |
| Academic sector<br>(percent)                                                                                        | 36                                             | 33                                             |
| Average adult acute-care medical and surgical<br>beds<br>(count)                                                    | 328                                            | 328                                            |
| Average annual case volume<br>(patient discharges per year)                                                         | 27,196                                         | 26,160                                         |
| <b>For Description</b>                                                                                              |                                                |                                                |
| Average year of establishment<br>(year)                                                                             | 1948                                           | 1948                                           |
| Religious affiliation<br>(percent)                                                                                  | 21                                             | 24                                             |
| Average annual budget<br>(million \$CAD)                                                                            | 183                                            | 183                                            |
| Average length of stay<br>(days)                                                                                    | 7                                              | 7                                              |
| Average 28-day readmission rate following<br>discharge after acute myocardial infarction<br>(rate per 100 patients) | 5.9                                            | 5.9                                            |
| Average use of clinical information technology<br>(percent)                                                         | 60                                             | 60                                             |
| Average patient rating of global quality<br>(percent)                                                               | 88                                             | 88                                             |

\* Data represent the distribution of characteristics within the population of readmissions, rather than the distribution of characteristics within all qualifying GTHA hospitals. Reported averages are medians.

**eTable 7: Primary Outcome Stratified by Secondary Hospital**

| Hospital                  | Sample Size<br>(count) | Unadjusted Odds<br>Ratio<br>(95% CI) | Adjusted Odds<br>Ratio*<br>(95% CI) |
|---------------------------|------------------------|--------------------------------------|-------------------------------------|
| <b>Academic Sector</b>    |                        |                                      |                                     |
| Mt Sinai                  | 6,535                  | 1.57 (1.36 – 1.80)                   | 1.17 (1.00 – 1.38)                  |
| St Joseph's (H)           | 7,726                  | 1.52 (1.31 – 1.77)                   | 1.22 (1.02 – 1.45)                  |
| St Michael's              | 9,744                  | 1.63 (1.43 – 1.85)                   | 1.24 (1.07 – 1.44)                  |
| Sunnybrook                | 10,110                 | 1.57 (1.40 – 1.77)                   | 1.23 (1.08 – 1.41)                  |
| University                | 15,335                 | 1.44 (1.30 – 1.60)                   | 1.20 (1.07 – 1.35)                  |
| Hamilton                  | 19,758                 | 1.42 (1.26 – 1.60)                   | 1.14 (0.99 – 1.31)                  |
| <b>Community Sector</b>   |                        |                                      |                                     |
| Markham <sup>†</sup>      | 3,723                  | 1.05 (0.88 – 1.27)                   | 0.82 (0.66 – 1.03)                  |
| Joseph Brant <sup>†</sup> | 6,397                  | 0.92 (0.76 – 1.12)                   | 0.90 (0.72 – 1.13)                  |
| Halton <sup>†</sup>       | 6,736                  | 1.03 (0.87 – 1.23)                   | 0.98 (0.79 – 1.21)                  |
| York Central              | 6,913                  | 1.32 (1.15 – 1.52)                   | 1.15 (0.97 – 1.35)                  |
| Rouge Valley              | 7,096                  | 1.06 (0.93 – 1.21)                   | 0.89 (0.77 – 1.04)                  |
| Credit Valley             | 7,371                  | 1.17 (1.02 – 1.35)                   | 0.97 (0.83 – 1.14)                  |
| Southlake                 | 8,405                  | 0.92 (0.78 – 1.09)                   | 0.88 (0.72 – 1.07)                  |
| St Joseph's (T)           | 9,057                  | 1.19 (1.06 – 1.35)                   | 1.06 (0.91 – 1.22)                  |
| Toronto East              | 9,455                  | 1.21 (1.07 – 1.36)                   | 1.10 (0.95 – 1.27)                  |
| Lakeridge                 | 9,472                  | 0.86 (0.74 – 1.00)                   | 1.00 (0.84 – 1.18)                  |
| Scarborough               | 10,072                 | 1.10 (0.99 – 1.23)                   | 0.92 (0.81 – 1.04)                  |
| William Osler             | 10,534                 | 1.20 (1.07 – 1.35)                   | 0.97 (0.84 – 1.11)                  |
| Trillium                  | 10,770                 | 1.25 (1.11 – 1.41)                   | 1.12 (0.97 – 1.29)                  |
| North York                | 10,965                 | 1.28 (1.14 – 1.42)                   | 1.11 (0.98 – 1.26)                  |
| Humber River              | 11,975                 | 1.35 (1.22 – 1.49)                   | 0.99 (0.88 – 1.11)                  |
| <b>Overall</b>            | <b>198,149</b>         | <b>1.26 (1.23 – 1.30)</b>            | -                                   |

\* Adjusted odds ratios for hospital-specific strata were generated using multivariate logistic regression.

†Multivariate logistic regression produced unstable adjusted odds ratios for these hospitals due to model nonconvergence.

**eTable 8: Diagnosis as Predictor of 30-day Mortality**

| Most Responsible Diagnosis for Secondary Hospitalization | Adjusted Odds Ratio* (95% CI) |
|----------------------------------------------------------|-------------------------------|
| Miscellaneous                                            | Reference                     |
| Malignant neoplasm                                       | 3.57 (3.16 – 4.03)            |
| Injury                                                   | 0.45 (0.41 – 0.48)            |
| Acute coronary syndrome                                  | 1.05 (0.94 – 1.16)            |
| Heart failure                                            | 0.91 (0.83 – 1.01)            |
| Pneumonia                                                | 1.87 (1.69 – 2.07)            |
| Obstructive lung disease                                 | 0.93 (0.85 – 1.02)            |
| Chronic ischemic heart disease                           | 0.67 (0.59 – 0.76)            |
| Cardiac arrhythmia                                       | 0.45 (0.41 – 0.50)            |
| Cerebrovascular disease                                  | 1.27 (1.13 – 1.42)            |
| Biliary tract disease                                    | 0.53 (0.49 – 0.58)            |
| Intestinal obstruction                                   | 0.60 (0.55 – 0.65)            |
| Gastrointestinal hemorrhage                              | 0.76 (0.70 – 0.82)            |
| Urinary tract infection                                  | 0.57 (0.52 – 0.62)            |
| Diabetes                                                 | 0.52 (0.47 – 0.58)            |
| Liver disease                                            | 2.29 (2.03 – 2.59)            |
| Fluid and electrolyte imbalance                          | 0.81 (0.73 – 0.90)            |
| Nonspecific chest pain                                   | 0.26 (0.24 – 0.28)            |
| Nonspecific abdominal pain                               | 0.40 (0.36 – 0.43)            |
| Acute renal failure                                      | 1.40 (1.24 – 1.58)            |
| Infections of the skin                                   | 0.43 (0.40 – 0.46)            |
| Sepsis                                                   | 3.10 (2.72 – 3.53)            |
| Appendicitis                                             | 0.54 (0.46 – 0.63)            |
| Diverticular disease                                     | 0.61 (0.55 – 0.68)            |
| Venous thromboembolism                                   | 0.76 (0.69 – 0.85)            |
| Nephrolithiasis                                          | 0.44 (0.41 – 0.47)            |
| Inflammatory bowel disease                               | 0.50 (0.46 – 0.55)            |
| Prostatic hypertrophy                                    | 0.24 (0.20 – 0.29)            |
| Syncope and collapse                                     | 0.24 (0.22 – 0.27)            |
| Cardiac arrest                                           | 7.23 (5.70 – 9.18)            |

\*As with Table 2, adjusted odds ratios presented here were generated by the model that treated continuous variables as categorical.

**eTable 9: Analysis of Sector Transitions and the Comparative Odds of 30-day Mortality Following Readmission**

| Hospital Sector Transition Comparison      | Adjusted Odds Ratio (95% CI) |
|--------------------------------------------|------------------------------|
| <b>Relatively Simple Comparisons</b>       |                              |
| AA(alternate) vs AA(original) <sup>a</sup> | 1.19 (1.12 – 1.26)           |
| CC(alternate) vs CC(original) <sup>b</sup> | 1.04 (1.00 – 1.07)           |
| <b>More Complicated Comparisons</b>        |                              |
| AC(alternate) vs AA(original) <sup>c</sup> | 1.52 (1.31 – 1.75)           |
| CA(alternate) vs CC(original) <sup>d</sup> | 0.74 (0.63 – 0.86)           |
| AA(original) vs CC(original) <sup>e</sup>  | 0.64 (0.55 – 0.75)           |

In the notation used here to express sector transitions, the first letter represents the sector of the primary hospital (A = Academic; C = Community), the second letter represents the sector of the secondary hospital, and the subscript indicates alternate- or original-hospital readmission. To perform the exploratory sector transition analysis, we created a six-level categorical term describing all possible sector transitions [i.e. AA(original), AA(alternate), AC(alternate), CA(alternate), CC(alternate), CC(original)]. The multivariate logistic regression model with generalized estimating equations used for the primary analysis was modified by removing the term for hospital sector and replacing the alternate-hospital readmission term used for the primary outcome with the categorical term for sector transition. The odds ratios listed for each comparison express the relative risk of 30-day mortality.

Within the academic sector (<sup>a</sup>) alternate-hospital readmission is associated with an increased risk of death, but within the community sector (<sup>b</sup>) the effect is only marginally significant. This finding is similar to the results of the analysis that stratified on secondary hospital sector (see page 10 of manuscript) and suggests that the association between alternate-hospital readmission and death is modified by hospital sector.

The remainder of the results listed above can be interpreted as follows: For patients initially admitted to an academic sector hospital, readmission to an alternate academic (<sup>a</sup>) or community hospital (<sup>c</sup>) is associated with an increased risk of death compared to readmission to the original academic hospital. For patients initially admitted to a community sector hospital, readmission to an alternate community hospital is associated with a risk of death that is not significantly different than the risk associated with readmission to the original hospital (<sup>b</sup>), yet readmission to academic hospital is associated with lower risk than returning to the original hospital (<sup>d</sup>). Original hospital readmissions within the academic sector are associated with a lower risk of death than original hospital readmissions within the community sector (<sup>e</sup>).

**eTable 10: Unadjusted Comparison of the Odds of 30-day Mortality Following Alternate-Hospital Readmission to the Odds of 30-day Mortality Following Original-Hospital Readmission, Stratified on Diagnosis**

| Most Responsible Diagnosis for Secondary Hospitalization | Unadjusted Odds Ratio (95% CI) |
|----------------------------------------------------------|--------------------------------|
| Miscellaneous                                            | 1.26 (1.19 - 1.33)             |
| Malignant neoplasm                                       | 1.22 (1.10 - 1.36)             |
| Injury                                                   | 2.27 (1.72 - 2.99)             |
| Acute coronary syndrome                                  | 0.93 (0.80 - 1.07)             |
| Heart failure                                            | 0.96 (0.87 - 1.06)             |
| Pneumonia                                                | 1.08 (0.97 - 1.19)             |
| Obstructive lung disease                                 | 1.03 (0.87 - 1.22)             |
| Chronic ischemic heart disease                           | 0.52 (0.35 - 0.76)             |
| Cardiac arrhythmia                                       | 0.97 (0.76 - 1.24)             |
| Cerebrovascular disease                                  | 1.20 (1.01 - 1.43)             |
| Biliary tract disease                                    | 1.00 (0.61 - 1.64)             |
| Intestinal obstruction                                   | 1.80 (1.32 - 2.45)             |
| Gastrointestinal hemorrhage                              | 1.03 (0.79 - 1.33)             |
| Urinary tract infection                                  | 1.38 (1.14 - 1.67)             |
| Diabetes                                                 | 0.93 (0.70 - 1.24)             |
| Liver disease                                            | 1.12 (0.91 - 1.37)             |
| Fluid and electrolyte imbalance                          | 1.12 (0.91 - 1.38)             |
| Nonspecific chest pain                                   | 0.75 (0.29 - 1.90)             |
| Nonspecific abdominal pain                               | 1.61 (0.61 - 4.23)             |
| Acute renal failure                                      | 1.32 (1.08 - 1.60)             |
| Infections of the skin                                   | 1.53 (1.00 - 2.35)             |
| Sepsis                                                   | 1.21 (1.02 - 1.43)             |
| Appendicitis *                                           | -                              |
| Diverticular disease                                     | 2.25 (1.43 - 3.55)             |
| Venous thromboembolism                                   | 0.89 (0.67 - 1.19)             |
| Nephrolithiasis *                                        | -                              |
| Inflammatory bowel disease *                             | -                              |
| Prostatic hypertrophy *                                  | -                              |
| Syncope and collapse                                     | 0.64 (0.25 - 1.63)             |
| Cardiac arrest                                           | 1.12 (0.78 - 1.6)              |

\* Effect estimates for these diagnoses could not be calculated as there were no deaths in the alternate-hospital group.

**eTable 11: Adjusted Comparison of the Odds of Mortality Following Alternate-Hospital Readmission to the Odds of Mortality Following Original-Hospital Readmission at Additional Time Points**

| Outcome                                | Adjusted Odds Ratio (95%CI) |
|----------------------------------------|-----------------------------|
| Death during secondary hospitalization | 1.05 (1.02 – 1.09)          |
| Death within 90 days                   | 1.04 (0.99 – 1.10)          |
| Death within 180 days                  | 1.03 (0.97 – 1.09)          |
| Death within one year                  | 1.01 (0.95 – 1.07)          |

Confidential

**eTable 12: Odds Ratio for Death Within 30 Days of Readmission in the Presence of an Unmeasured Confounder With a Hazard Ratio of 2.0 for Death and Various Prevalence Levels of the Confounder, by Exposure Group**

|                                                              | Prevalence of Risk Factor in Original-Hospital Readmissions |             |             |             |             |             |
|--------------------------------------------------------------|-------------------------------------------------------------|-------------|-------------|-------------|-------------|-------------|
|                                                              | 0.0                                                         | 0.1         | 0.2         | 0.3         | 0.4         | 0.5         |
| Prevalence of Risk Factor in Alternate-Hospital Readmissions |                                                             |             |             |             |             |             |
| 0.0                                                          | 1.00                                                        | 0.89        | 0.80        | 0.72        | 0.65        | 0.59        |
| 0.1                                                          | <b>1.13</b>                                                 | 1.00        | 0.90        | 0.81        | 0.73        | 0.66        |
| 0.2                                                          | <b>1.26</b>                                                 | <b>1.12</b> | 1.00        | 0.90        | 0.82        | 0.74        |
| 0.3                                                          | <b>1.40</b>                                                 | <b>1.24</b> | <b>1.11</b> | 1.00        | 0.91        | 0.82        |
| 0.4                                                          | <b>1.54</b>                                                 | <b>1.37</b> | <b>1.23</b> | <b>1.10</b> | 1.00        | 0.91        |
| 0.5                                                          | <b>1.69</b>                                                 | <b>1.50</b> | <b>1.35</b> | <b>1.21</b> | <b>1.10</b> | 1.00        |
| 0.6                                                          | <b>1.85</b>                                                 | <b>1.65</b> | <b>1.47</b> | <b>1.33</b> | <b>1.20</b> | <b>1.09</b> |
| 0.7                                                          | <b>2.02</b>                                                 | <b>1.80</b> | <b>1.61</b> | <b>1.45</b> | <b>1.31</b> | <b>1.19</b> |
| 0.8                                                          | <b>2.20</b>                                                 | <b>1.96</b> | <b>1.75</b> | <b>1.58</b> | <b>1.43</b> | <b>1.30</b> |
| 0.9                                                          | <b>2.39</b>                                                 | <b>2.12</b> | <b>1.90</b> | <b>1.71</b> | <b>1.55</b> | <b>1.41</b> |
| 1.0                                                          | <b>2.59</b>                                                 | <b>2.30</b> | <b>2.06</b> | <b>1.86</b> | <b>1.68</b> | <b>1.53</b> |



eFigure 1: Study Schematic

## Appendix Figure 1: Study Schematic

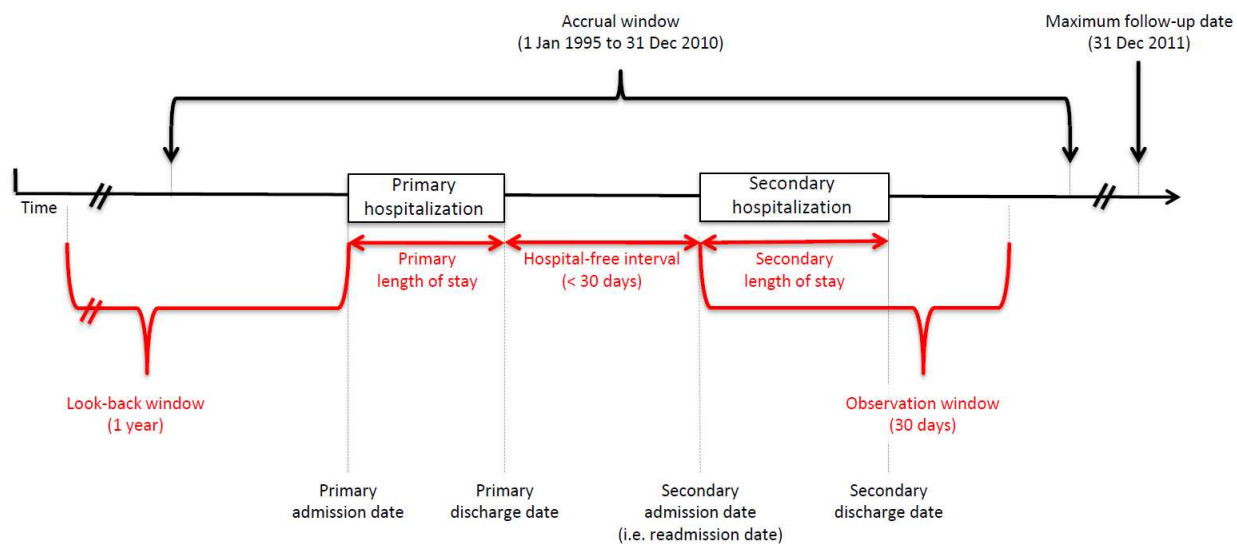

1  
2  
3  
4  
5  
6  
7  
8  
9  
10  
11  
12  
13  
14  
15  
16  
17  
18  
19  
20  
21  
22  
23  
24  
25  
26  
27  
28  
29  
30  
31  
32  
33  
34  
35  
36  
37  
38  
39  
40  
41  
42  
43  
44  
45  
46  
47  
48  
49  
50  
51  
52  
53  
54  
55  
56  
57  
58  
59  
60

eFigure 2: Hospital Flow Diagram

## Appendix Figure 2: Hospital Flow Diagram

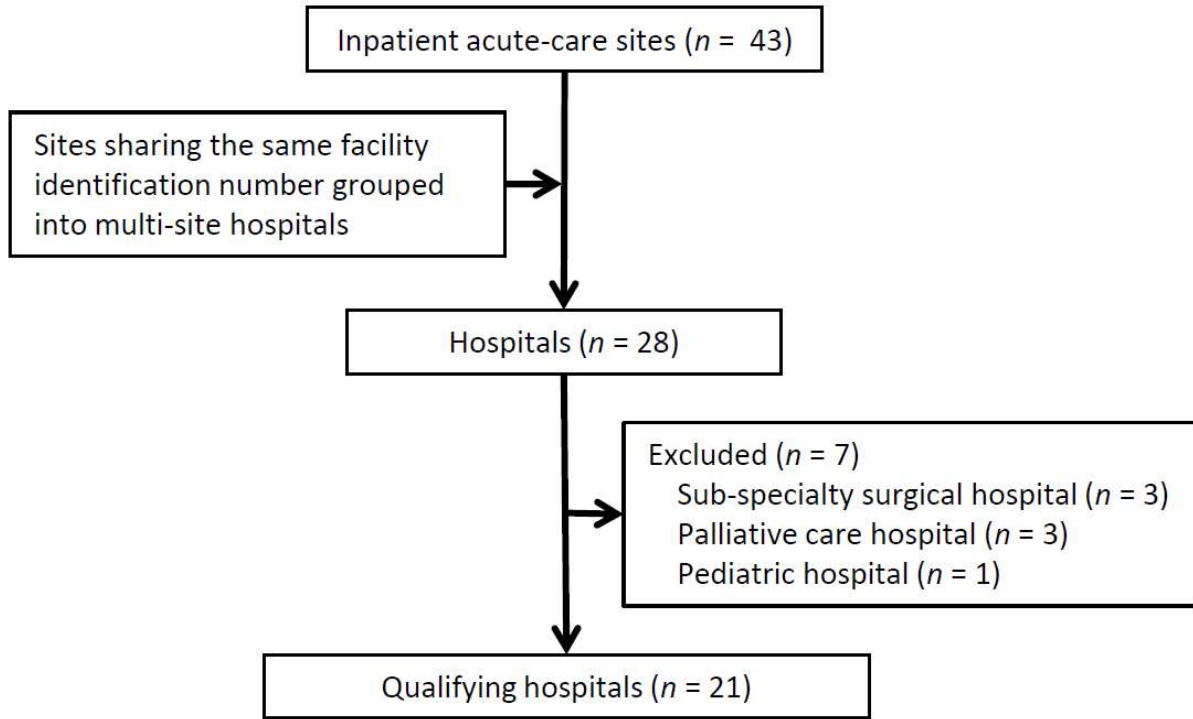

eFigure 3: Frequency Graph for Eligible Readmissions

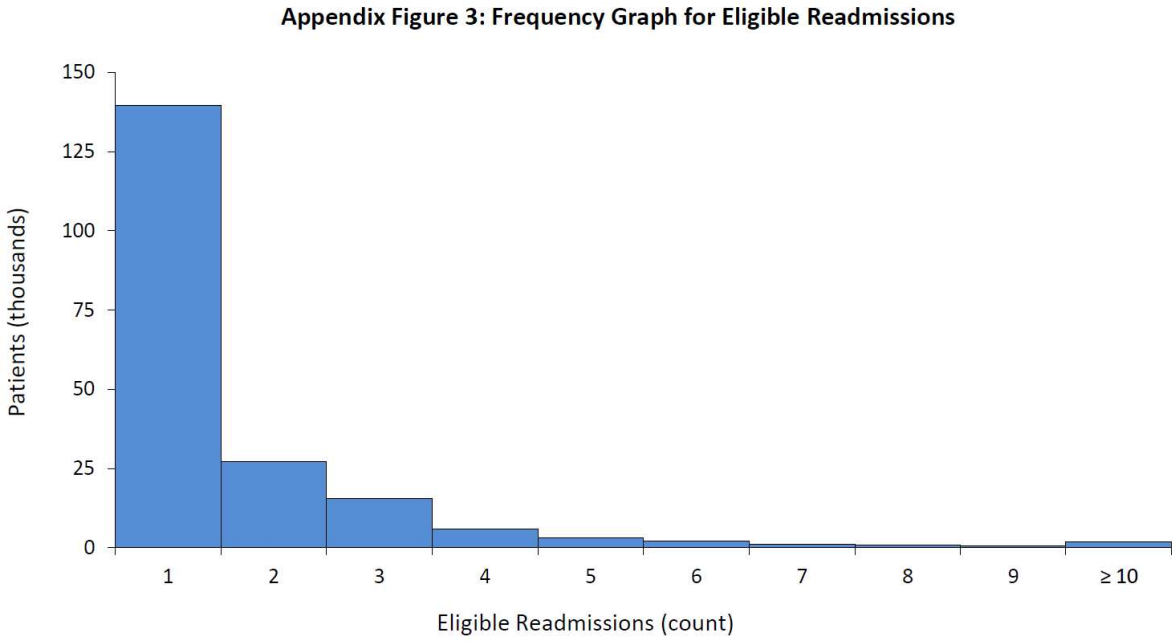

Confidential

1  
2  
3  
4  
5  
6  
7  
8  
9  
10  
11  
12  
13  
14  
15  
16  
17  
18  
19  
20  
21  
22  
23  
24  
25  
26  
27  
28  
29  
30  
31  
32  
33  
34  
35  
36  
37  
38  
39  
40  
41  
42  
43  
44  
45  
46  
47  
48  
49  
50  
51  
52  
53  
54  
55  
56  
57  
58  
59  
60

1  
2  
3  
4  
5  
6  
7  
8  
9  
10  
11  
12  
13  
14  
15  
16  
17  
18  
19  
20  
21  
22  
23  
24  
25  
26  
27  
28  
29  
30  
31  
32  
33  
34  
35  
36  
37  
38  
39  
40  
41  
42  
43  
44  
45  
46  
47  
48  
49  
50  
51  
52  
53  
54  
55  
56  
57  
58  
59  
60

### eFigure 4: Comparing Primary and Secondary Hospital Stratification

Appendix Figure 4a: Unadjusted Odds Ratio for 30-day Mortality, Stratified by Secondary Hospital

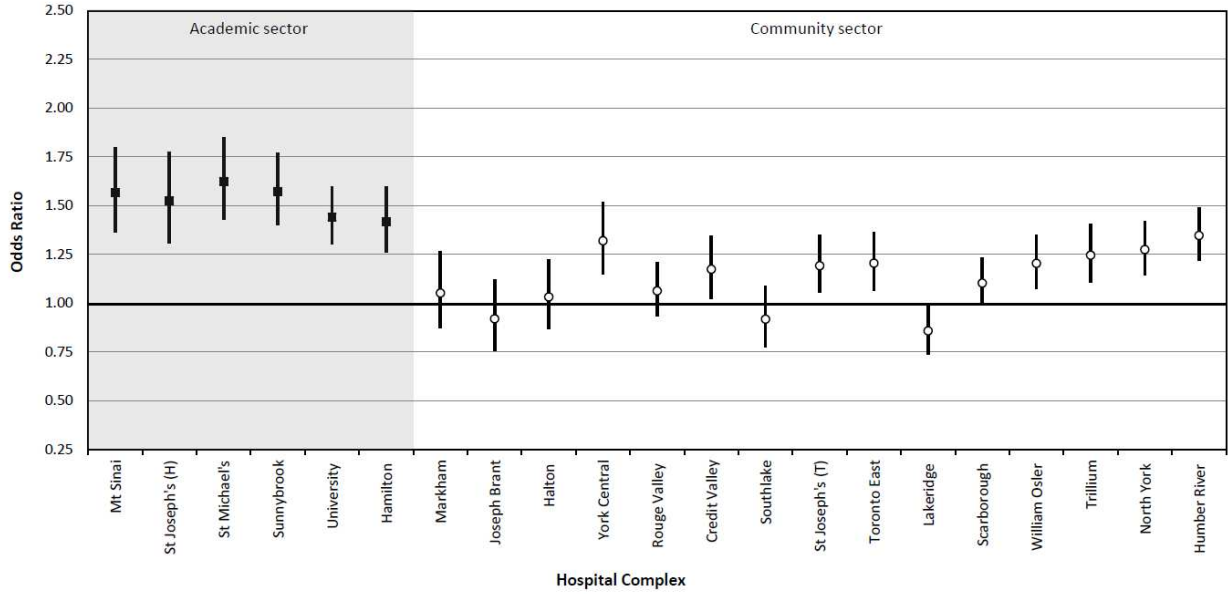

Appendix Figure 4b: Unadjusted Odds Ratio for 30-day Mortality, Stratified by Primary Hospital

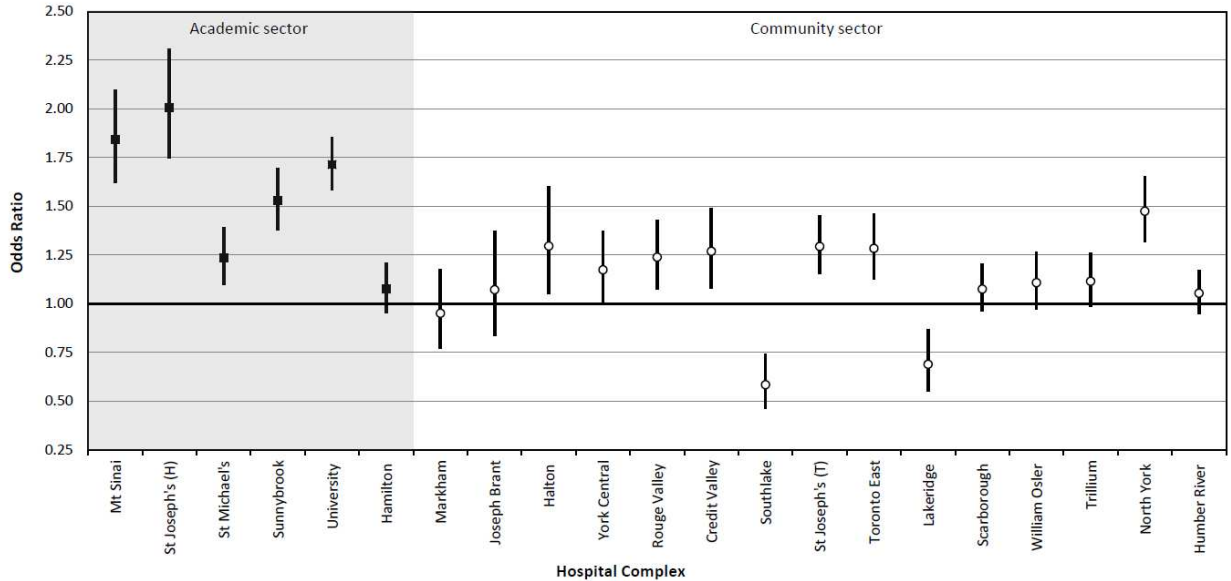

Legend: Data points represent the hospital-specific odds ratio comparing the odds of death within 30 days of alternate-hospital readmission to the odds of death within 30 days of original-hospital readmission. In eFigure 3a, patients were assigned to their secondary (ie readmission) hospital. In eFigure 3b, patients were assigned to their primary (ie admission) hospital. Black square data points indicate academic sector hospitals. White circle data points indicate community sector hospitals. Vertical lines represent the 95% confidence interval for the associated data point.
